# Supplementary material for: Uncovering cynicism in medical training: a qualitative analysis of medical online discussion forums
Source: PubMed Central journal article supplement — BMJ Open. 2018 Oct 18;8(10):e022883. doi: 10.1136/bmjopen-2018-022883 (PMC6196850; doi:10.1136/bmjopen-2018-022883), 2018-10-18
Supplement: bmjopen-2018-022883.draft_revisions.pdf [file bmjopen-2018-022883.draft_revisions.pdf]

# BMJ Open

BMJ Open is committed to open peer review. As part of this commitment we make the peer review history of every article we publish publicly available.

When an article is published we post the peer reviewers' comments and the authors' responses online. We also post the versions of the paper that were used during peer review. These are the versions that the peer review comments apply to.

The versions of the paper that follow are the versions that were submitted during the peer review process. They are not the versions of record or the final published versions. They should not be cited or distributed as the published version of this manuscript.

BMJ Open is an open access journal and the full, final, typeset and author-corrected version of record of the manuscript is available on our site with no access controls, subscription charges or pay-per-view fees (<http://bmjopen.bmj.com>).

If you have any questions on BMJ Open's open peer review process please email [editorial.bmjopen@bmj.com](mailto:editorial.bmjopen@bmj.com)

# BMJ Open

## Uncovering cynicism in medical training: A qualitative analysis of medical online discussion forums

|                                                                                                                                                                |                                                                                                                                                                                                           |
|----------------------------------------------------------------------------------------------------------------------------------------------------------------|-----------------------------------------------------------------------------------------------------------------------------------------------------------------------------------------------------------|
| Journal:                                                                                                                                                       | <i>BMJ Open</i>                                                                                                                                                                                           |
| Manuscript ID                                                                                                                                                  | bmjopen-2018-022883                                                                                                                                                                                       |
| Article Type:                                                                                                                                                  | Research                                                                                                                                                                                                  |
| Date Submitted by the Author:                                                                                                                                  | 11-Mar-2018                                                                                                                                                                                               |
| Complete List of Authors:                                                                                                                                      | Peng, Jenny ; University of Ottawa Faculty of Medicine<br>Clarkin, Chantalle; Children's Hospital of Eastern Ontario Research Institute<br>Doja, Asif; Children's Hospital of Eastern Ontario, Pediatrics |
| Keywords:                                                                                                                                                      | MEDICAL EDUCATION & TRAINING, QUALITATIVE RESEARCH, World Wide Web technology < BIOTECHNOLOGY & BIOINFORMATICS                                                                                            |
| <p>Note: The following files were submitted by the author for peer review, but cannot be converted to PDF. You must view these files (e.g. movies) online.</p> |                                                                                                                                                                                                           |
| <p>Medical Discussion Forum(1).nvpX</p>                                                                                                                        |                                                                                                                                                                                                           |

SCHOLARONE™  
Manuscripts

1  
2  
3  
4 **Uncovering cynicism in medical training: A qualitative analysis of medical online**  
5  
6 **discussion forums**  
7

8 **Jenny Peng BHSc<sup>1</sup>, Chantalle Clarkin RN, PhD<sup>2</sup>, A. Doja MEd, MD<sup>1,3</sup>**  
9

- 10  
11 1. Faculty of Medicine, University of Ottawa, 451 Smyth Rd, Ottawa, ON, K1H 8M5  
12  
13 2. Children's Hospital of Eastern Ontario Research Institute, 401 Smyth Rd, Ottawa,  
14  
15 ON, K1H 8L1  
16  
17 3. Department of Pediatrics, Children's Hospital of Eastern Ontario, 401 Smyth Rd,  
18  
19 Ottawa, ON, K1H 8L1  
20  
21

22 **Corresponding author:** Asif Doja, Department of Pediatrics, Children's Hospital of  
23  
24 Eastern Ontario, 401 Smyth Rd, Ottawa, ON, K1H 8L1, ph: (613) 737-7600, fax: (613)  
25  
26 738-4297, adoja@cheo.on.ca  
27  
28  
29  
30  
31  
32  
33  
34  
35  
36  
37  
38  
39  
40  
41  
42  
43  
44  
45  
46  
47  
48  
49  
50  
51  
52  
53  
54  
55  
56  
57  
58  
59  
60

## ABSTRACT

**OBJECTIVES:** The development of cynicism in medical trainees is a significant concern for medical educators. Our goal was to utilize online medical student discussion groups to provide insight into how cynicism in medicine is perceived, the consequences of cynicism on medical trainee development, and potential links between the hidden curriculum and cynicism.

**DESIGN:** Qualitative analysis.

**SETTING:** Analysis of postings in 2 medical student discussion groups: Premed101 (Canadian) and Student Doctor Network (American).

**METHODS:** 511 posts from 7 discussion topics were analyzed using NVivo 11. Inductive content analysis was used to develop a data-driven coding scheme that evolved throughout analysis. Measures were taken to ensure the trustworthiness of findings, including duplicate independent coding of a subsample of posts and the maintenance of an audit trail.

**RESULTS:** Medical students, residents, and staff participating in the discussion forums engaged in discourse about cynicism and highlighted themes of the hidden curriculum resulting in cynicism. These included the progression of cynicism over the course of medical training as a coping mechanism; the development of challenging work environments due to factors such as limited support, hierarchal demands, and long work hours; and the challenge of initiating change due to the tolerance of unprofessionalism and the highly stressful nature of medicine.

**CONCLUSION:** Our study of North American medical discussion posts demonstrates that cynicism develops progressively and is compounded by conflicts between the hidden and

1  
2  
3  
4 formal curriculum. Online discussion groups have the potential to provide unique insight  
5  
6 into the culture of medical training and the hidden curriculum among academic institutions.  
7  
8  
9

## 10 11 **ARTICLE SUMMARY**

### 12 13 **Strengths and limitations of this study:**

- 14  
15 • Strength: online discussion forums allow for inclusion and analysis of anonymous  
16  
17 feedback provided by medical trainees
- 18  
19 • Strength: online forums allow for dynamic interactions and participation among  
20  
21 individuals from several training sites rather than a single academic institution
- 22  
23 • Limitation: results may represent a subset of individuals who post on online  
24  
25 discussion forums  
26  
27  
28

### 29 30 **INTRODUCTION:**

31  
32 Cynicism, defined as a decline in empathy and emotional neutralization during  
33  
34 medical training, is a continued concern for medical educators. <sup>1,2</sup> One hypothesis to the  
35  
36 development of cynicism among trainees is perceived conflict between the formal and hidden  
37  
38 curriculum, with the hidden curriculum defined as “a set of influences that function at the level of  
39  
40 organizational structure and culture” that impact the perception of medicine and decision making by  
41  
42 medical trainees.<sup>2,3</sup> Conflicts between the formal and hidden curriculum likely occur when  
43  
44 trainees enter the clinical setting and realize the values of patient-centered care are often  
45  
46 challenged by the demanding, time-pressured realities of medicine.<sup>4,5</sup>  
47  
48  
49

50  
51 There remains some debate in the literature on whether empathy wanes and  
52  
53 cynicism escalates as one progresses in training.<sup>6,7,8,9,10</sup> Studies examining the underlying  
54  
55 factors that contribute towards increasing cynicism and declining empathy are mostly  
56  
57  
58  
59  
60

1  
2  
3  
4 qualitative in nature and primarily sample students and residents from a single academic  
5  
6 institution.<sup>2,11,12,13,14,15,16</sup>  
7

8  
9 Online discussion forums are widely popular and have been leveraged to provided  
10  
11 insight into a variety of topics in medical education.<sup>17,18,19</sup> For medical trainees, online  
12  
13 discussion forums such as Premed101 and Student Doctor Network are used to contribute  
14  
15 questions, advice, and opinions regarding issues in medicine, the training process, and  
16  
17 education. This allows for dynamic sharing of information at various levels of medical  
18  
19 training in a safe digital space that can be widely disseminated across institutions and  
20  
21 archived for further participation at multiple time points. Contributors to these online  
22  
23 forums can remain anonymous, which promotes honest, open discussions. These digital  
24  
25 forums can serve as unique resources to better understand trainee cynicism and the hidden  
26  
27 curriculum.  
28  
29  
30

31  
32 Our goal was to perform a qualitative content analysis of online medical discussion  
33  
34 forums (Student Doctor Network and Premed101) to explore: trainees' perceptions of  
35  
36 cynicism, when cynicism occurs, whether cynicism is progressive through medical training,  
37  
38 and the factors that enable and constrain the development of cynicism. We also sought to  
39  
40 examine the impact of the hidden curriculum on the development of cynicism.  
41  
42  
43  
44

## 45 **METHODS**

46  
47  
48 Online discussion boards are categorized by topics known as threads, which feature  
49  
50 questions, observations or conversations points. Online forums have provided users with  
51  
52 more 'democratic' landscapes where they can share spontaneous narratives. These  
53  
54 narratives represent a rich collection of emotional discourse, which are ideally suited for  
55  
56  
57  
58  
59  
60

1  
2  
3  
4 qualitative analysis, because this is where the tension between the lived experiences of  
5  
6 medicine, healthcare, hidden curriculum, learning, expectations, behaviours and their  
7  
8 interpretations exist. Commenters may reply to the original thread and to each other in text  
9  
10 format on these discussion boards, which result in records that can be downloaded. We  
11  
12 examined original postings and response posts from Premed 101  
13  
14 (<http://forums.premed101.com/>), a Canadian website, and Student Doctor Network(SDN)  
15  
16 (<http://www.studentdoctor.net/>), an American website, specifically looking for threads  
17  
18 pertinent to the development of cynicism. These two forums are the most widely used  
19  
20 discussion forums among medical professionals in their respective countries, which was  
21  
22 why they were chosen for analysis in this study. In order to identify threads for analysis,  
23  
24 we used a purposeful sampling strategy, and a study member (JZP) completed a  
25  
26 preliminary scan of discussion forum content and posts from 2010 to 2016 for relevance to  
27  
28 the study topic. Based on the initial scan and most common terms noted in relevant threads,  
29  
30 a keyword search was then conducted to locate additional threads and posts using the  
31  
32 following search terms: ‘cynicism’, ‘empathy’, ‘mental health’, and ‘medical school stress.’  
33  
34 Once the preliminary review was complete, the research team met to discuss forum content  
35  
36 and select threads for inclusion based on relevance to the topic. The research team was  
37  
38 comprised of a male physician with a Master’s in Education with experience conducting  
39  
40 qualitative research (AD), a female medical student with qualitative training (JZP), and a  
41  
42 female registered nurse with doctoral-level education and training in qualitative  
43  
44 methodology (CC). Following this initial selection, threads were examined in a stepwise  
45  
46 fashion with the understanding that the final sample size would be determined by the  
47  
48 analytical requirement of data saturation and that additional threads would be reviewed as  
49  
50  
51  
52  
53  
54  
55  
56  
57  
58  
59  
60

1  
2  
3  
4 required.<sup>20</sup> We progressed gradually through analysis until no new ideas could be derived  
5  
6 from the review of successive data and the collection of new data did not offer further  
7  
8 insight on the topic.<sup>21</sup> At this point, theoretical sufficiency was reached and data collection  
9  
10 was complete.<sup>22</sup> Data was imported into NVivo11 (QSR International) to facilitate data  
11  
12 management.  
13  
14

15  
16 We used a qualitative approach to perform inductive content analysis to identify the  
17  
18 key themes in the discussion threads. During analysis, data was examined repeatedly in  
19  
20 order to discern patterns and themes.<sup>23</sup> The process of coding the data and recognizing the  
21  
22 overarching themes and subthemes involved three main stages: open coding, axial coding,  
23  
24 and selective coding.<sup>24,25</sup> First, two researchers trained in qualitative methods (JZP and CC)  
25  
26 reviewed the data independently, line-by-line, to identify patterns and generate a set of  
27  
28 preliminary codes.<sup>26</sup> The researcher team then met to discuss initial impressions of the data  
29  
30 and the preliminary codes. Second, during the axial coding phase the code set was revised,  
31  
32 refined, and regrouped into themes, highlighting areas of similarity and differences. Finally,  
33  
34 during selective coding, a general description of the research topic was formulated and the  
35  
36 central phenomenon was constructed from the data. Codes were re-organized around  
37  
38 unified themes. At this final stage, the team met to discuss themes, review the selected  
39  
40 quotes, and establish concurrence. JZP and CC also searched threads for positive deviants  
41  
42 that challenged existing themes. The trustworthiness of our findings was enhanced through  
43  
44 the use of multiple independent coders, and team consensus building discussions at all three  
45  
46 phases of coding. We conceptualized the varied perspectives of the research team members  
47  
48 as an essential component of the interpretive process. The research team also maintained a  
49  
50 detailed audit-trail of all coding and data-related decision making.  
51  
52  
53  
54  
55  
56  
57  
58  
59  
60



### *Ethical Considerations*

The Children's Hospital of Eastern Ontario Research Ethics Board approved this research protocol prior to study commencement. While individual-level informed consent was not required for the analysis of aggregate data, we elicited permission from individual commenters prior to including direct quotations of comments or posting in the discussion threads. These select commenters were contacted privately via direct message to seek permission to include their anonymized quote in study publications and materials, and all commenters were given the opportunity to review their quote prior to its inclusion.

### *Patient Involvement*

Patients were not involved in this research. Results will be disseminated to participants by posting a link to the published articles in both Premed101 and Student Doctor Network.

## **RESULTS**

A total of 511 posts from 7 discussion threads in Premed 101 and SDN were included in analysis (See Table 1). A total of 205 posters participated in these discussion forums. Commenters self-identified as medical students, residents, and faculty staff, although not all commenters stated their level of training. Two posters were from other career backgrounds such as pharmacy and dentistry. We constructed three overarching themes and six sub-themes in our analysis. (See Table 2)

### **1. The challenges inherent to the hierarchal and demanding nature of medicine**

A common discussion topic in the online forums was the challenging nature of medicine and medical training. The following sub-themes were recognized: *the progression of cynicism over time in medical training; reinforcement of hierarchy in medicine that creates a challenging work environment; and the pressure to work long hours and high*

1  
2  
3  
4 *demands in medicine*. Interestingly, there was widespread consensus that empathy declined  
5  
6 and cynicism increased during the medical training process and no positive deviants were  
7  
8 noted.  
9

#### 10 11 *1A. The progression of cynicism over time in medical training*

12  
13 There was consensus that the loss of idealism in medicine and feelings of cynicism  
14  
15 occurred during the course of training from student to physician. Discussion posts  
16  
17 emphasized that this occurs when patients are seen as a diagnosis rather than as people and  
18  
19 as trainees become clinicians who prioritize efficient practice.  
20  
21

22  
23 Although trainees are exposed to the physical and mental struggles faced by patients  
24  
25 on a daily basis, the discussion groups revealed that this aspect of the clinical environment  
26  
27 seemed to contribute less in creating cynicism. Rather than long work hours and a heavy  
28  
29 workload, trainees expressed that perception of their low rank, worthlessness, and  
30  
31 disrespect from mentors led to emotional neutralization. Consequently, they highlighted  
32  
33 that time points in which cynicism predominates are transitions from pre-clerkship to  
34  
35 clerkship and beyond. Cynicism was portrayed as a “staircase” that the trainee climbs  
36  
37 during their career path rather than sporadic changes in attitude from individual clinical  
38  
39 encounters. As students become more exposed to “real doctoring” in the clinical setting,  
40  
41 cynicism may be a coping mechanism designed to protect oneself from hardships that one  
42  
43 observes and experiences during medical training.  
44  
45  
46  
47

#### 48 *1B. Reinforcement of hierarchy in medicine that creates a challenging work environment*

49  
50 Medical students and clerks were in agreement that some of the greatest challenges  
51  
52 they faced stemmed from the learning environment in the clinical context rather than the  
53  
54 formal requirements of content and curriculum. Professional training was described as  
55  
56  
57  
58  
59  
60

1  
2  
3  
4 being cut throat and competitive, hindered by administrative policies, long hours, and the  
5  
6 need to constantly maintain high level performance. Posters addressed the work culture  
7  
8 challenges of residency that contributed to an overarching sense of not being respected or  
9  
10 valued, including having limited control over scheduling, exposure to challenging  
11  
12 colleagues and situations, and a general lack of recognition and support. It was believed  
13  
14 that long work hours were a symptom of larger cultural problems in medical education  
15  
16 rather than the root cause of the negative experiences.  
17  
18

19  
20 “That said, work hours are a symptom of the main problem: the attitude in medicine  
21  
22 that treats residents (and to a lesser extent staff physicians and medical students)  
23  
24 like they somehow don't have the same human needs as everyone else. Long work  
25  
26 hours, lack of schedule control, lack of appreciation, and all the other forms of  
27  
28 disrespect you list.” (Thread 7)

### 29 *1C. Pressure to work long hours and high demands for efficiency*

30  
31 Sleep deprivation was repeatedly noted among students and residents as a major  
32  
33 reason for feeling unhappy during training. Trainees shared a sample of their schedule,  
34  
35 where working in the hospital often meant staying for long hours and subsequently arriving  
36  
37 at early times for the following day.

38  
39 “Vampirish and inhumane hours, 12-15 hour days or staying up all night and then  
40  
41 (if you're lucky) sleeping a few restless hours during the day only to then go do it  
42  
43 the next day/night, 6 or 7 days a week, for 3-7 years.” (Thread 1)

44  
45 The reported consequence of devoting the majority of one's clinical hours to  
46  
47 meeting the demands of medical training included the breakdown of interpersonal  
48  
49 relationships outside of the hospital. Trainees felt isolated, as they felt it challenging to  
50  
51 have social interactions when work hour demands are rigorous. Students, residents and staff  
52  
53 described this barrier as a cause of personal grief and feelings of isolation, which may  
54  
55 contribute towards cynicism in all stages of medical training.  
56  
57  
58  
59  
60

1  
2  
3  
4 “Above all, the breakdown of old relationships and the inability to form new ones...  
5 I don't think age takes the sting off of any of these.” (Thread 1)

6 Another conflict shared by trainees pertained to wanting to meet staff demands

7  
8  
9 while simultaneously balancing the amount of time spent directly with patients. For  
10  
11 example, in order to get work done in time for rounds, some patient needs were bypassed.

12  
13 Several trainees expressed that the desire for efficiency and pleasing staff resulted in the  
14  
15 objectification of patients and eventual loss of compassion.  
16

17  
18 Posts have attributed this desire for efficiency as a healthcare system issue that aims  
19  
20 to quickly move patients in and out of hospitals. Commenters emphasized that doctors start  
21  
22 out as genuine, but become jaded after trying to keep up with the highly demanding system  
23  
24 for long periods of time.  
25

26  
27 “...we all want to be "good doctors", do the right thing. The sad thing is that after a  
28  
29 year or two of 1/4 call, where your worth as a person is determined by how quickly  
30  
31 and efficiently you can keep the system moving, all of that goes out the window. It  
32  
33 is a broken system that makes broken doctors.” (Thread 7)

## 34 **2. The challenge of safeguarding well-being**

35  
36 The desire to maintain a sense of balance and well-being, professionally and  
37  
38 personally, was a topic of discussion in the online boards. The following sub-themes were  
39  
40 recognized: *the lack of support as a major stressor*, and *the consequences of cynicism on*  
41  
42 *physician well-being and patient care*.  
43

### 44 **2A. Lack of support as a major stressor**

45  
46  
47 Overall, residents described feeling undervalued for their work in hospitals. In some  
48  
49 instances, residents pointed out that their pay did not correspond to the high stress  
50  
51 environment that they were constantly working in, as well as the long, unpredictable hours.  
52  
53 These sentiments were expressed in both the Canadian and American contexts on the online  
54  
55  
56  
57  
58  
59  
60

1  
2  
3  
4 discussion forums. The sense of inadequate support also seemed to stem from a sense of  
5  
6 impaired autonomy over work and personal life schedules, constantly having to relocate  
7  
8 and adapt to working in unfamiliar and new environments, and general isolation due to  
9  
10 work commitment. Posts repeatedly highlighted how aspects of residency training  
11  
12 neglected “basic human needs” and failed to consider trainees’ personal wellbeing due to  
13  
14 prioritizing work needs.  
15  
16

17  
18 “After all, surgical have the same requirements for a healthy lifestyle as other  
19 residents, despite the occasional assertion to the contrary. Surgeons still need to  
20 sleep, eat, exercise, socialize and spend time with their families, just like everyone  
21 else.” (Thread 7)  
22

23  
24 Several medical students discussed lacking support in terms of the discordance  
25  
26 between meeting their attending’s demands and their syllabus expectations. Students  
27  
28 repeatedly emphasized their “low status on the totem pole” in the clinical environment, and  
29  
30 felt that this lowly status instilled a hesitance to advocate for change due to fear of poor  
31  
32 evaluations or seeming unprofessional if reported to the clerkship director. Students also  
33  
34 emphasized that advocating for improvement seemed futile as they cannot resign from the  
35  
36 job of a medical student if they are truly unhappy during a placement, and would rather  
37  
38 tolerate mistreatment than risk poor judgment from preceptors.  
39  
40

#### 41 42 *2B. Consequences of cynicism on physician well-being and patient care* 43

44  
45 A common theme across discussion boards was the consequences of progressive  
46  
47 cynicism throughout medical training, which likely had a negative impact on physician  
48  
49 career satisfaction, the quality of patient care, and the quality of mentorship for future  
50  
51 generations. Many also highlighted the intergenerational transmission of norms and how  
52  
53 unhappy doctors tend to produce more unhappy doctors.  
54  
55  
56  
57  
58  
59  
60

1  
2  
3  
4 Medical trainee mental health was raised in a number of discussion threads related  
5  
6 to career satisfaction. Commenters noted the high rate of poor mental health documented  
7  
8 among medical students and residents compared to other professions. However, several  
9  
10 students and residents were hesitant to seek help because they feared that this would be  
11  
12 perceived as a sign of “weakness” in a field where professionalism and perseverance are  
13  
14 highly valued. Overall, commenters felt that contributing factors to poor mental health  
15  
16 should be addressed rather than criticizing individuals who suffer in order to promote  
17  
18 changes in attitude in the medical profession.  
19  
20  
21

22  
23 Acknowledging cynicism in medical school also prompted individuals in the  
24  
25 discussion groups to recognize the implications of mentorship. They advocated for the need  
26  
27 for more focus on the consequences of cynicism in medicine. Posts praised the existence of  
28  
29 forums that discussed the nature of cynicism in medicine, acknowledging that open  
30  
31 dialogue and information sharing can support change, such as creating more informed pre-  
32  
33 med students, promoting mental health programs in medical schools and residency, and  
34  
35 working towards improving work environments rather than perpetuating shame in  
36  
37 medicine.  
38  
39  
40

41 “Even at your (our) early stage of training, your actions and attitudes help to shape  
42  
43 the culture in medicine. Please, help move it in the right direction, away from  
44  
45 blaming the victim and towards fixing the problems that caused the harm in the first  
46  
47 place.” (Thread 6)

### 48 **3. The culture of tolerance of unprofessional behaviours throughout training and across** 49 **generations**

50  
51 Commenters felt that unprofessional work environments in medicine were slow to  
52  
53 change due to the stigma among students and residents that feeling overwhelmed is an  
54  
55  
56  
57  
58  
59  
60

1  
2  
3  
4 indication of being inadequate. Unprofessional behavior in this context typically referred to  
5  
6 a lack of respect that trainees received from supervisors and trying to meet high demands in  
7  
8 medicine that may compromise good patient care. Consequently, trainees are afraid to seek  
9  
10 help or admit to being overworked in an environment where individuals are typically very  
11  
12 high-achievers and set high expectations for themselves and their colleagues. The  
13  
14 perpetuation of stressful work environments may be due to transmission of norms, namely  
15  
16 preceptors normalizing the challenges they experienced in their formative years and then  
17  
18 maintaining similar conditions for their trainees.  
19  
20  
21

22  
23 “I've seen so many residents embrace the attitude in this weird form of quasi-  
24 Stockholm Syndrome, where they downplay, excuse, or even support the negative  
25 aspects of being a resident all while their quality of life suffers. I understand it as a  
26 coping mechanism, but it keeps that attitude alive for the next generation of  
27 residents.” (Thread 7)  
28

29  
30 “A culture in medicine that reflexively defends the sucky parts of medicine as  
31 necessary or desirable isn't a culture that's likely to promote change.” (Thread 7)  
32

33 Students and trainees acknowledged that the harsh work environment and lack of respect  
34  
35 posed a greater challenge than solely long work hours. However, the culture to prevail and  
36  
37 achieve in medicine was again brought up as the reason for continued silence.  
38

39  
40 “It is the med-school culture. There is little support. Students just don't admit how  
41 hard it is. There is an unsaid stigma that feeling stressed/overwhelmed/exhausted/or  
42 hurt makes one "weak" in medical school.” (Thread 5)  
43

44 Ultimately, the consequence of defending a culture that pushes for high efficiency and  
45  
46 achievements at the expense of the individual's wellbeing was viewed as a barrier to  
47  
48 progress in medical education.  
49

50  
51 “It is still so difficult for people in medicine to open up about their struggles. When  
52 these disclosures are met with criticism, it encourages everyone else who may be  
53 unhappy with their situation to continue to suffer in silence.” (Thread 6)  
54  
55  
56  
57  
58  
59

## DISCUSSION

Our analysis of discussion posts exploring cynicism by Canadian and American medical students, residents, and faculty members emphasized three key findings: 1) the challenges inherent to the hierarchal and demanding nature of medicine; 2) the need to safeguard well-being; and 3) the culture of tolerance of unprofessional behaviors.

Results from previous studies have not made a definitive conclusion on whether empathy declines as medical students enter their clinical year of training. While some studies note that the first drastic decline in empathy and loss of idealization occurs in third year of medical school, others have suggested that changes in empathy levels do not differ significantly as medical students and residents progress in their training.<sup>16,27,28,29,30,31</sup> Our analysis of online discussion forums supports the notion that the loss of empathy and development of cynicism are progressive in nature and evolve largely during the transition from pre-clerkship to clerkship. This may occur because clerkship students are faced with similar clinical challenges and ethical dilemmas as the rest of the medical team, but have a minimal authoritative role. Being in this position makes students more vulnerable to influences by their mentors, and students may feel conflicted when their personal values of “good doctoring” do not align with preceptors’ practices of “real doctoring.” Our results align with other studies demonstrating that the hierarchal nature of medicine and poor role modeling can create unprofessional work environments and increased stress on trainees. This unprofessionalism may be more distressing than frequent exposure to traumatic clinical cases.<sup>8,32,33</sup>

Testerman et al. have proposed two models for the development of cynicism: 1) the intergenerational model, where a student’s cynicism occurs progressively as a coping



1  
2  
3  
4 mechanism to mistreatment by cynical residents and staff, and 2) the professional identity  
5 model that suggests cynicism among trainees declines as individuals attain a higher  
6 authoritative position and become more confident in dealing with the contradicting values  
7 of the formal and hidden curriculum.<sup>12</sup> Testerman et al. supported the professional identity  
8 model because they noted a decline in cynicism among staff who achieved a “professional  
9 identity,” as compared to residents and students. Results from our study, however, seem to  
10 favor the intergenerational model, as residents describe being more cynical during  
11 residency when compared to medical school, and attribute this progression to a “staircase”  
12 that one climbs throughout training. This conceptualization of the development and  
13 progression of cynicism was also noted in a study by Griffith et al, as within the first 5  
14 months of postgraduate training, residents perceived their patients with less idealistic  
15 values.<sup>34</sup>

16  
17  
18  
19  
20  
21  
22  
23  
24  
25  
26  
27  
28  
29  
30  
31  
32 Research has linked elements of the hidden curriculum to the development of  
33 cynicism. In a study of internal medicine residents, Billings ME et al. demonstrated that the  
34 hidden curriculum, and specifically unprofessional behavior from colleagues, nurses, and  
35 patients, correlated with residents’ level of depersonalization, emotional exhaustion, and  
36 level of cynicism.<sup>35</sup> Similar to our findings, residents from this study also attributed  
37 belittlement from staff, lack of control over scheduling, loss of autonomy in the clinical  
38 setting, and poor work relationships as factors that led to burnout. Increasing cynicism  
39 among residents parallels the pattern of increasing cynicism among medical students; both  
40 medical students and residents start medical school and internship with higher empathy and  
41 lower emotional distress, but experience a decline in empathy overtime.<sup>7,27</sup> Our findings  
42 suggest that there may be a “double hit” scenario, where trainees are most vulnerable to  
43  
44  
45  
46  
47  
48  
49  
50  
51  
52  
53  
54  
55  
56  
57  
58  
59  
60

1  
2  
3  
4 increased cynicism when transitioning to clerkship, and then again when transitioning to  
5  
6 residency. It has been posited that this may be a protective mechanism at times of  
7  
8 transition.<sup>14,15</sup>  
9

10  
11 Emotional neutralization, a consequence of cynicism, carries a negative connotation  
12  
13 during the early medical training process. That said, practicing physicians view emotional  
14  
15 neutralization as a coping mechanism to sustain the various clinical, hierarchal, and system  
16  
17 challenges that one faces in medicine.<sup>36</sup> Our findings support that cynicism occurs when  
18  
19 trainees cope to safeguard their personal wellbeing in a highly demanding work  
20  
21 environment. The impact of cynicism among physicians is substantial; consequences  
22  
23 include a decline in professionalism, burnout, and a loss of empathy that can ultimately  
24  
25 jeopardize patient care.<sup>1,35,37</sup> In order to mitigate these consequences, an understanding of  
26  
27 how and why cynicism develops is key. Online forums provide a holistic view into this  
28  
29 topic by presenting diverse perspectives from geographically dispersed individuals, and  
30  
31 across the spectrum of training and practice.  
32  
33  
34  
35

36  
37 As emphasized in previous studies, our findings also support the importance of role  
38  
39 modeling and mentorship in addressing cynicism and the hidden curriculum.<sup>38,39,40,41,42</sup>  
40  
41 Students and residents seek inspiration from mentors and experience more idealism when  
42  
43 they identify positive role models.<sup>7,43</sup> On the other hand, the lack of positive role models,  
44  
45 such as being taught by cynical residents and staff, facilitated the development of cynicism  
46  
47 and a decline in empathy among medical students.<sup>1,35,44</sup> Results from our study support the  
48  
49 notion that mentorship and positive role modeling should be made available throughout  
50  
51 medical training, such that professional attitudes and support can be passed on from staff to  
52  
53 trainees. Mentorship structures should be reinforced during the transition period from pre-  
54  
55  
56  
57  
58  
59  
60

1  
2  
3  
4 clerkship to clerkship, and from medical school to residency, as these seem to be key  
5  
6 moments when there is a potential increase in cynicism and decline in empathy.  
7

8  
9 A major strength of this study design is that online discussion forums allow for a  
10  
11 greater understanding of the hidden curriculum at an international level due to the ease of  
12  
13 access to forums by users from Canada and the USA. That said, given the we were unable  
14  
15 to isolate the geographical location of posters, this study does not allow for a detailed  
16  
17 commentary on potential areas of congruence or divergence between nations. Given that  
18  
19 our findings reflect many viewpoints from varying locations, levels of training, and  
20  
21 specialties, our results may have greater external validity compared to previous studies that  
22  
23 explored the perspectives of trainees from a single academic institution.<sup>2,11,14,15</sup> The  
24  
25 capacity for user anonymity on forums promotes honest, dynamic interactions between  
26  
27 individuals with lower risk of consequence. These forums create a democratic space for  
28  
29 sharing emotionally powerful experiences that highlight the tension between the realities of  
30  
31 medicine as influenced by the hidden curriculum and personal expectations of good  
32  
33 doctoring. Online discussion forums can also minimize social desirability response bias,  
34  
35 which may be present in other qualitative methods that involve face-to-face interaction with  
36  
37 peers and colleagues, such as focus groups involving staff, residents, and medical students.  
38  
39 In a discussion forum, the hierarchal nature of medicine is minimized such that the pressure  
40  
41 to respond in a manner perceived as acceptable or one that aligns with the dominant  
42  
43 discourse are lessened.  
44  
45  
46  
47  
48  
49

50 Our study has some notable limitations. Contributors to discussion forums may be  
51  
52 biased towards individuals who use forums to discuss their concerns and provide support  
53  
54 for others on the site. Discussion posters in this study may comprise of individuals that feel  
55  
56  
57  
58  
59  
60

1  
2  
3  
4 more vulnerable and are reaching out anonymously for this reason, and they may in fact be  
5  
6 more cynical than the general medical community. Although commenters on the discussion  
7  
8 boards did not identify their country of origin, we assume that most commenters are  
9  
10 residents of either the United States or Canada, reflecting North American medical practice.  
11  
12 Additionally, our purposeful sampling and selection strategy of threads for inclusion in  
13  
14 analysis could have introduced bias. For example, by selecting threads that explicitly  
15  
16 examined cynicism, we may have inadvertently excluded threads containing divergent or  
17  
18 opposing views.  
19  
20  
21

## 22 **CONCLUSION**

23  
24  
25 Online discussion groups have the potential to provide unique insight into the  
26  
27 culture of medical training. Our findings highlight that exposure to the differing values of  
28  
29 the formal and hidden curriculum seems to impact cynicism in trainees at all stages of  
30  
31 learning, and particularly at transition points. Interventions that can help reduce cynicism  
32  
33 could focus on decreasing the gap between the formal and hidden curriculum that is passed  
34  
35 on through stages of medical training. Examples of such interventions include mentorship  
36  
37 and positive role modeling, especially at transition periods from pre-clerkship to clerkship  
38  
39 and from medical school to residency. Future studies could explore perceptions and  
40  
41 attitudes among trainees at key transition points to further examine how cynicism evolves  
42  
43 between various stages of training.  
44  
45  
46  
47  
48  
49

50 *Contributors:* JP contributed to the acquisition, data analysis, interpretation and drafting of  
51  
52 the project. CC contributed to the design, data analysis and interpretation of the work, and  
53  
54 revised the manuscript for important intellectual content. AD contributed to the design, data  
55  
56  
57  
58  
59  
60

1  
2  
3  
4 analysis and interpretation of the work, and revised the manuscript for important  
5  
6 intellectual content. All authors approved the final manuscript for publication.  
7

8  
9 *Acknowledgements:* None  
10

11 *Funding:* This research received no specific grant from any funding agency in the public,  
12 commercial, or not-for-profit sectors  
13

14  
15 *Conflicts of Interest:* None  
16

17 *Ethical Approval:* This study was approved by the Children's Hospital of Eastern Ontario  
18 Research Institute Research Ethics Board (ref 16/31X).  
19

20  
21 *Data sharing:* Raw data has been uploaded as a supplementary file  
22

## 23 **REFERENCES:**

- 24  
25 1. Brazeau CM, Schroeder R, Rovi S, Boyd L. Relationships between medical student  
26 burnout, empathy, and professionalism climate. *Acad Med* 2010; 85: S33-S36.  
27
- 28  
29 2. Lempp H, Seale C. The hidden curriculum in undergraduate medical education:  
30 qualitative study of medical students' perceptions of teaching. *BMJ* 2004; 329: 770-3.  
31  
32
- 33  
34 3. Hafferty FW. Beyond curriculum reform: Confronting medicine's hidden  
35 curriculum. *Acad Med* 1998; 73: 403-407.  
36  
37
- 38  
39 4. White CB, Kumagai AK, Ross PT, Fantone JC. A qualitative exploration of how the  
40 conflict between the formal and informal curriculum influences student values and  
41 behaviors. *Acad Med* 2009; 84: 597-603.  
42  
43
- 44  
45 5. West CP, Shanafelt TD. The influence of personal and environmental factors on  
46 professionalism in medical education. *BMC Medical Education* 2007; 7:29.  
47  
48
- 49  
50 6. Hojat M, Vergare M, Maxwell K, Brainard G, Herrine S, Isenberg G, Veloski J,  
51 Gonnella J. The devil is the third year: A longitudinal study of erosion of empathy in  
52 medical school. *Acad Med* 2009; 84: 1182-1191.  
53  
54  
55  
56  
57  
58  
59  
60

- 1  
2  
3  
4 7. Neumann M, Edelhauser F, Tauschel D, Fischer MR, Wirtz M, Woopen C et al.  
5  
6 Empathy decline and its reasons: a systematic review of studies with medical students  
7  
8 and residents. *Acad Med* 2011; 86: 996-1009.  
9
- 10  
11 8. Newton BW, Barber L, Clardy J, Cleveland E, O'Sullivan P. Is there hardening of the  
12  
13 heart during medical school? *Acad Med* 2008; 83: 244-249.  
14
- 15  
16 9. Singh S. Empathy: Lost or Found in Medical Education? *MedGenMed* 2005; 7: 74.  
17
- 18  
19 10. Chen DR, Pahilan ME, Orlander JD. Comparing a self-administered measure of  
20  
21 empathy with observed behavior among medical students. *Journal of General*  
22  
23 *Internal Medicine* 2010; 25: 200-202.  
24
- 25  
26 11. Gaufberg E, Batalden M, Sands R, Bell S. The hidden curriculum: What can we learn  
27  
28 from third-year medical student narrative reflections? *Acad Med* 2010; 85: 1709 –  
29  
30 1716.  
31
- 32  
33 12. Testerman JK, Morton KR, Loo LK, Worthley JS, Lambertson HH. The natural  
34  
35 history of cynicism in physicians. *Acad Med* 1996; 71: S43-S45.  
36
- 37  
38 13. Hojat M, Mangione S, Nasca TJ, Rattner S, Erdmann JB, Gonnella JS et al. An  
39  
40 empirical study of decline in empathy in medical school. *Med Educ* 2004; 38: 934-41.  
41
- 42  
43 14. Bellini LM, Baime M, Shea JA. Variation of mood and empathy during internship.  
44  
45 *JAMA* 2002; 287: 3143-3146.  
46
- 47  
48 15. Bellini LM, Shea JA. Mood change and empathy decline persist during three years of  
49  
50 Internal Medicine Training. *Acad Med* 2005; 80: 164-167.  
51
- 52  
53 16. Stratta EC, Riding DM, Baker P. Ethical erosion in newly qualified doctors:  
54  
55 perceptions of empathy decline. *Int J Med Educ* 2016; 7: 286 – 92.  
56  
57  
58  
59  
60

17. Sherbino J, Joshi N, Lin M. JGME-ALiEM Hot topics in medical education online journal club: An analysis of a virtual discussion about resident teachers. *J Grad Med Educ* 2015; 7: 437-44.
18. Makoul G, Zick AB, Aakhus M, Neely KJ, Roemer PE. Using an online forum to encourage reflection about difficult conversations in medicine. *Patient Educ Couns* 2010; 79: 83-6.
19. Barnett S, Jones SC, Caton T, Iverson D, Bennett S, Robinson L. Implementing a virtual community of practice for family physician training: a mixed-methods case study. *J Med Internet Res* 2014; 16: e83.
20. Fusch PI, Ness LR. Are we there yet? Data saturation in qualitative research. *The Qualitative Report* 2015; 20: 1408.
21. Bradley EH, Curry LA, Devers KJ. Qualitative data analysis for health services research: developing taxonomy, themes, and theory. *Health services research* 2007; 42:1758-1772.
22. Varpio L, Ajjawi R, Monrouxe LV, O'brien BC, Rees CE. Shedding the cobra effect: problematising thematic emergence, triangulation, saturation and member checking. *Med Educ* 2017; 51: 40-50.
23. Strauss A, Corbin J. Basics of qualitative research: Grounded theory procedures and techniques. Newbury Park: SAGE Publications 1990.
24. Bohm A. Theoretical coding: Text analysis in Grounded Theory. (In U Flick, E Kardorff, I Steinke (Eds.), A companion to qualitative research (p 270 – 275). London: SAGE Publications 2004.

- 1  
2  
3  
4 25. Gooden RJ, Windfield HR. Breast and prostate cancer online discussion boards: a  
5  
6 thematic analysis of gender differences and similarities. *Journal of Health*  
7  
8 *Psychology* 2007; 12: 103-114.  
9
- 10  
11 26. Elo S, Kyngas H. The qualitative content analysis process. *J Adv Nurs* 2008; 62: 107-  
12  
13 115.  
14
- 15  
16 27. Ludwig AB, Burton W, Weingarten J, Milan F, Myers DC, Kligler B. Depression and  
17  
18 stress amongst undergraduate medical students. *BMC Med Educ* 2015; 15: 141.  
19
- 20  
21 28. Roff S. Reconsidering the “decline” of medical student empathy as reported in  
22  
23 studies using the Jefferson Scale of Physician Empathy-Student version (JSPE-S).  
24  
25 *Med Teach* 2015; 37: 1-4.  
26
- 27  
28 29. Bratek A, Buiska W, Bonk M, Seweryn M, Krysta K. Empathy among physicians,  
29  
30 medical students, and candidates. *Psychiatr Danub* 2015; 27: S48-52.  
31
- 32  
33 30. Shashikumar R, Chaudhary R, Ryali VS, Bhat PS, Srivastava K, Prakash J, Basannar  
34  
35 D. Cross sectional assessment of empathy among undergraduates from a medical  
36  
37 college. *Med J Armed Forces India* 2014; 70: 179- 85.  
38
- 39  
40 31. Hegazi I, Wilson I. Maintaining empathy in medical school: it is possible. *Med teach*  
41  
42 2013; 35: 1002-8.  
43
- 44  
45 32. Haglund M, aan het Rot M, Cooper NS, et al. Resilience in the third year of medical  
46  
47 school: A prospective study of the associations between stressful events occurring  
48  
49 during clinical rotations and student well-being. *Acad Med* 2009; 84: 258-268.  
50
- 51  
52 33. Dornan T, Pearson E, Carson P, Helmich E, Bundy C. Emotions and identity in the  
53  
54 figured world of becoming a doctor. *Med Educ* 2015; 49: 174-85.  
55  
56  
57  
58  
59  
60



- 1  
2  
3  
4 34. Griffith CH, Wilson JF. The loss of idealism throughout internship. *Eval Health Prof*  
5  
6 2003; 26: 415-426.  
7
- 8  
9 35. Billings ME, Lazarus ME, Wenrich M, Curtis JR, Engelberg RA. The effect of the  
10  
11 hidden curriculum on resident burnout and cynicism. *J Grad Med Educ* 2011; 3: 503-  
12  
13 10.  
14
- 15  
16 36. Doja A, Bould DM, Clarkin C, Eady K, Sutherland S, Writer H. The hidden and  
17  
18 informal curriculum across the continuum of training: A cross-sectional qualitative  
19  
20 study. *Med Teach* 2016; 38: 410-8.  
21
- 22  
23 37. Prins JT, Gazendam Donofrio SM, Tubben BJ, van der Heijden FM, van de Wiel  
24  
25 HB, Hoekstra-Weebers JE. Burnout in medical residents: a review. *Med Educ* 2007;  
26  
27 41: 788-800.  
28
- 29  
30 38. McKenna AM, Straus SE. Charting a professional course: A review of mentorship  
31  
32 in medicine. *J Am Coll Radiol* 2011; 8: 109-112.  
33
- 34  
35 39. Straus SE, Johnson MO, Marquez C, Feldman MD. Characteristics of successful  
36  
37 and failed mentoring relationships: A qualitative study across two academic health  
38  
39 centers. *Acad Med* 2013; 88: 82-89.  
40
- 41  
42 40. Stamm M, Buddeberg-Fischer B. The impact of mentoring during postgraduate  
43  
44 training on doctors' career success. *Med Educ* 2011; 45: 488-96.  
45
- 46  
47 41. Rose GL, Rukstalis MR, Schuckit MA. Informal mentoring between faculty and  
48  
49 medical students. *Acad Med* 2005; 80: 344-8.  
50
- 51  
52 42. Howe A. Professional development in undergraduate medical curricula – the key to  
53  
54 the door of a new culture? *Med Educ* 2002; 36: 353-9.  
55  
56  
57  
58  
59  
60

43. Kay J. Traumatic deidealization and the future of medicine. *JAMA* 1990; 263: 572-573.

44. Greganti MA. Where are the clinical role models? *Arch Intern Med* 1990; 150: 259-261.

**Table 1: Summary of discussion threads analyzed, discussion forums and country of origin for each thread and the number of posts examined.**

| Thread Name                                                                   | Discussion forum and Country of Origin | Number of posts | Number of posters |
|-------------------------------------------------------------------------------|----------------------------------------|-----------------|-------------------|
| 1. Excessive and unnecessary stress on med students                           | Student Doctor Network – United States | 269             |                   |
| 2. How does med school change a person                                        | Student Doctor Network – United States | 22              |                   |
| 3. My theory on why med students show decline in empathy                      | Student Doctor Network – United States | 46              |                   |
| 4. Why the cynicism                                                           | Student Doctor Network – United States | 54              |                   |
| 5. Mental health in medical school                                            | Student Doctor Network – United States | 29              |                   |
| 6. What they don't tell you before getting into medicine                      | Premed101 – Canada                     | 42              |                   |
| 7. Is it possible to finish med school without becoming too salty or cynical? | Premed101 – Canada                     | 49              |                   |

**Table 2 Themes and subthemes from discussion group analysis**

| Themes of the Hidden Curriculum                                               | Pertinent subthemes                                                                                                                                                                                         |
|-------------------------------------------------------------------------------|-------------------------------------------------------------------------------------------------------------------------------------------------------------------------------------------------------------|
| <b>Challenges inherent to the hierarchal and demanding nature of medicine</b> | <i>The progression of cynicism over time</i><br><i>The reinforcement of hierarchy that creates an unpleasant work environment</i><br><i>The pressure to work long hours and high demands for efficiency</i> |
| <b>Challenges of safeguarding well-being</b>                                  | <i>Lack of support as a major stressor</i><br><i>Consequences of cynicism on physician well-being and patient care</i>                                                                                      |

1  
2  
3  
4  
5  
6  
7  
8  
9  
10  
11  
12  
13  
14  
15  
16  
17  
18  
19  
20  
21  
22  
23  
24  
25  
26  
27  
28  
29  
30  
31  
32  
33  
34  
35  
36  
37  
38  
39  
40  
41  
42  
43  
44  
45  
46  
47  
48  
49  
50  
51  
52  
53  
54  
55  
56  
57  
58  
59  
60

|                                                                                                    |  |
|----------------------------------------------------------------------------------------------------|--|
| <b>Culture of tolerance of unprofessional behaviors throughout training and across generations</b> |  |
|----------------------------------------------------------------------------------------------------|--|

For peer review only

## COREQ (CONsolidated criteria for REporting Qualitative research) Checklist

A checklist of items that should be included in reports of qualitative research. You must report the page number in your manuscript where you consider each of the items listed in this checklist. If you have not included this information, either revise your manuscript accordingly before submitting or note N/A.

| Topic                                          | Item No. | Guide Questions/Description                                                                                                                              | Reported on Page No. |
|------------------------------------------------|----------|----------------------------------------------------------------------------------------------------------------------------------------------------------|----------------------|
| <b>Domain 1: Research team and reflexivity</b> |          |                                                                                                                                                          |                      |
| <i>Personal characteristics</i>                |          |                                                                                                                                                          |                      |
| Interviewer/facilitator                        | 1        | Which author/s conducted the interview or focus group?                                                                                                   |                      |
| Credentials                                    | 2        | What were the researcher's credentials? E.g. PhD, MD                                                                                                     |                      |
| Occupation                                     | 3        | What was their occupation at the time of the study?                                                                                                      |                      |
| Gender                                         | 4        | Was the researcher male or female?                                                                                                                       |                      |
| Experience and training                        | 5        | What experience or training did the researcher have?                                                                                                     |                      |
| <i>Relationship with participants</i>          |          |                                                                                                                                                          |                      |
| Relationship established                       | 6        | Was a relationship established prior to study commencement?                                                                                              |                      |
| Participant knowledge of the interviewer       | 7        | What did the participants know about the researcher? e.g. personal goals, reasons for doing the research                                                 |                      |
| Interviewer characteristics                    | 8        | What characteristics were reported about the interviewer/facilitator? e.g. Bias, assumptions, reasons and interests in the research topic                |                      |
| <b>Domain 2: Study design</b>                  |          |                                                                                                                                                          |                      |
| <i>Theoretical framework</i>                   |          |                                                                                                                                                          |                      |
| Methodological orientation and Theory          | 9        | What methodological orientation was stated to underpin the study? e.g. grounded theory, discourse analysis, ethnography, phenomenology, content analysis |                      |
| <i>Participant selection</i>                   |          |                                                                                                                                                          |                      |
| Sampling                                       | 10       | How were participants selected? e.g. purposive, convenience, consecutive, snowball                                                                       |                      |
| Method of approach                             | 11       | How were participants approached? e.g. face-to-face, telephone, mail, email                                                                              |                      |
| Sample size                                    | 12       | How many participants were in the study?                                                                                                                 |                      |
| Non-participation                              | 13       | How many people refused to participate or dropped out? Reasons?                                                                                          |                      |
| <i>Setting</i>                                 |          |                                                                                                                                                          |                      |
| Setting of data collection                     | 14       | Where was the data collected? e.g. home, clinic, workplace                                                                                               |                      |
| Presence of non-participants                   | 15       | Was anyone else present besides the participants and researchers?                                                                                        |                      |
| Description of sample                          | 16       | What are the important characteristics of the sample? e.g. demographic data, date                                                                        |                      |
| <i>Data collection</i>                         |          |                                                                                                                                                          |                      |
| Interview guide                                | 17       | Were questions, prompts, guides provided by the authors? Was it pilot tested?                                                                            |                      |
| Repeat interviews                              | 18       | Were repeat interviews carried out? If yes, how many?                                                                                                    |                      |
| Audio/visual recording                         | 19       | Did the research use audio or visual recording to collect the data?                                                                                      |                      |
| Field notes                                    | 20       | Were field notes made during and/or after the interview or focus group?                                                                                  |                      |
| Duration                                       | 21       | What was the duration of the interviews or focus group?                                                                                                  |                      |
| Data saturation                                | 22       | Was data saturation discussed?                                                                                                                           |                      |
| Transcripts returned                           | 23       | Were transcripts returned to participants for comment and/or                                                                                             |                      |

| Topic                                  | Item No. | Guide Questions/Description                                                                                                        | Reported on Page No. |
|----------------------------------------|----------|------------------------------------------------------------------------------------------------------------------------------------|----------------------|
|                                        |          | correction?                                                                                                                        |                      |
| <b>Domain 3: analysis and findings</b> |          |                                                                                                                                    |                      |
| <i>Data analysis</i>                   |          |                                                                                                                                    |                      |
| Number of data coders                  | 24       | How many data coders coded the data?                                                                                               |                      |
| Description of the coding tree         | 25       | Did authors provide a description of the coding tree?                                                                              |                      |
| Derivation of themes                   | 26       | Were themes identified in advance or derived from the data?                                                                        |                      |
| Software                               | 27       | What software, if applicable, was used to manage the data?                                                                         |                      |
| Participant checking                   | 28       | Did participants provide feedback on the findings?                                                                                 |                      |
| <i>Reporting</i>                       |          |                                                                                                                                    |                      |
| Quotations presented                   | 29       | Were participant quotations presented to illustrate the themes/findings?<br>Was each quotation identified? e.g. participant number |                      |
| Data and findings consistent           | 30       | Was there consistency between the data presented and the findings?                                                                 |                      |
| Clarity of major themes                | 31       | Were major themes clearly presented in the findings?                                                                               |                      |
| Clarity of minor themes                | 32       | Is there a description of diverse cases or discussion of minor themes?                                                             |                      |

Developed from: Tong A, Sainsbury P, Craig J. Consolidated criteria for reporting qualitative research (COREQ): a 32-item checklist for interviews and focus groups. *International Journal for Quality in Health Care*. 2007. Volume 19, Number 6: pp. 349 – 357

**Once you have completed this checklist, please save a copy and upload it as part of your submission. DO NOT include this checklist as part of the main manuscript document. It must be uploaded as a separate file.**

# BMJ Open

## Uncovering cynicism in medical training: A qualitative analysis of medical online discussion forums

|                                 |                                                                                                                                                                                                           |
|---------------------------------|-----------------------------------------------------------------------------------------------------------------------------------------------------------------------------------------------------------|
| Journal:                        | <i>BMJ Open</i>                                                                                                                                                                                           |
| Manuscript ID                   | bmjopen-2018-022883.R1                                                                                                                                                                                    |
| Article Type:                   | Research                                                                                                                                                                                                  |
| Date Submitted by the Author:   | 23-May-2018                                                                                                                                                                                               |
| Complete List of Authors:       | Peng, Jenny ; University of Ottawa Faculty of Medicine<br>Clarkin, Chantalle; Children's Hospital of Eastern Ontario Research Institute<br>Doja, Asif; Children's Hospital of Eastern Ontario, Pediatrics |
| <b>Primary Subject Heading</b>: | Medical education and training                                                                                                                                                                            |
| Secondary Subject Heading:      | Qualitative research                                                                                                                                                                                      |
| Keywords:                       | MEDICAL EDUCATION & TRAINING, QUALITATIVE RESEARCH, World Wide Web technology < BIOTECHNOLOGY & BIOINFORMATICS                                                                                            |
|                                 |                                                                                                                                                                                                           |

SCHOLARONE™  
Manuscripts

Peer Review Only

1  
2  
3  
4 **Uncovering cynicism in medical training: A qualitative analysis of medical online**  
5 **discussion forums**  
6  
7

8 **Jenny Peng MD<sup>1</sup>, Chantalle Clarkin RN, PhD<sup>2</sup>, A. Doja MEd, MD<sup>1,3</sup>**  
9

- 10  
11 1. Faculty of Medicine, University of Ottawa, 451 Smyth Rd, Ottawa, ON, K1H 8M5  
12  
13 2. Children's Hospital of Eastern Ontario Research Institute, 401 Smyth Rd, Ottawa,  
14  
15 ON, K1H 8L1  
16  
17 3. Department of Pediatrics, Children's Hospital of Eastern Ontario, 401 Smyth Rd,  
18  
19 Ottawa, ON, K1H 8L1  
20  
21

22 **Corresponding author:** Asif Doja, Department of Pediatrics, Children's Hospital of  
23  
24 Eastern Ontario, 401 Smyth Rd, Ottawa, ON, K1H 8L1, ph: (613) 737-7600, fax: (613)  
25  
26 738-4297, adoja@cheo.on.ca  
27  
28  
29  
30  
31  
32  
33  
34  
35  
36  
37  
38  
39  
40  
41  
42  
43  
44  
45  
46  
47  
48  
49  
50  
51  
52  
53  
54  
55  
56  
57  
58  
59  
60

## ABSTRACT

**BACKGROUND:** The development of cynicism in medicine, defined as a decline in empathy and emotional neutralization during medical training, is a significant concern for medical educators. Online student discussion groups may allow insight into how cynicism in medicine is perceived, the consequences of cynicism on medical trainee development, and potential links between the hidden curriculum and cynicism.

**METHODS:** 511 posts from 7 discussion topics in Premed101 (Canadian) and Student Doctor Network (American) forums were analyzed using NVivo 11. Inductive content analysis was used to develop a data-driven coding scheme that evolved throughout analysis. Measures were taken to ensure the trustworthiness of findings, including duplicate independent coding of a subsample of posts and the maintenance of an audit trail.

**RESULTS:** Medical students, residents, and staff participating in the discussion forums engaged in discourse about cynicism and highlighted themes of the hidden curriculum resulting in cynicism. These included the progression of cynicism over the course of medical training as a coping mechanism; the development of challenging work environments due to factors such as limited support, hierarchical demands, and long work hours; and the challenge of initiating change due to the tolerance of unprofessionalism and the highly stressful nature of medicine.

**CONCLUSION:** Our study of North American medical discussion posts demonstrates that cynicism develops progressively and is compounded by conflicts between the hidden and formal curriculum. Online discussion groups have the potential to provide unique insight into the culture of medical training and the hidden curriculum among academic institutions.



## ARTICLE SUMMARY

Strengths and limitations of this study:

- Strength: online discussion forums allow for inclusion and analysis of anonymous feedback provided by medical trainees
- Strength: online forums allow for dynamic interactions and participation among individuals from several training sites rather than a single academic institution
- Limitation: results may represent a subset of individuals who post on online discussion forums

## INTRODUCTION:

Cynicism, defined as a decline in empathy and emotional neutralization during medical training, is a continued concern for medical educators.<sup>1,2</sup> One hypothesis to the development of cynicism among trainees is perceived conflict between the formal and hidden curriculum, with the hidden curriculum defined as “a set of influences that function at the level of organizational structure and culture” that impact the perception of medicine and decision making by medical trainees.<sup>2,3</sup> Conflicts between the formal and hidden curriculum likely occur when trainees enter the clinical setting and realize the values of patient-centered care are often challenged by the demanding, time-pressured realities of medicine.<sup>4,5</sup>

There remains some debate in the literature on whether empathy wanes and cynicism escalates as one progresses in training.<sup>6,7,8,9,10</sup> Studies examining the underlying factors that contribute towards increasing cynicism and declining empathy are mostly qualitative in nature and primarily sample students and residents from a single academic institution.<sup>2,11,12,13,14,15,16</sup>

1  
2  
3  
4 Online discussion forums are widely popular and have been leveraged to provided  
5 insight into a variety of topics in medical education.<sup>17,18,19</sup> For medical trainees, online  
6 discussion forums such as Premed101 and Student Doctor Network are used to contribute  
7 questions, advice, and opinions regarding issues in medicine (e.g. the residency matching  
8 process, perceived competitiveness of specialties), the training process, and education.<sup>20,21</sup>  
9 This allows for dynamic sharing of information at various levels of medical training in a  
10 safe digital space that can be widely disseminated across institutions and archived for  
11 further participation at multiple time points. These digital forums can serve as unique  
12 resources to better understand trainee cynicism and the hidden curriculum.  
13  
14  
15  
16  
17  
18  
19  
20  
21  
22  
23

24  
25 Our goal was to perform a qualitative content analysis of online medical discussion  
26 forums (Student Doctor Network and Premed101) to explore: trainees' perceptions of  
27 cynicism, when cynicism occurs, whether cynicism is progressive through medical training,  
28 and the factors that enable and constrain the development of cynicism. We also sought to  
29 examine the impact of the hidden curriculum on the development of cynicism.  
30  
31  
32  
33  
34  
35  
36  
37  
38

## 39 **METHODS**

40  
41 Online discussion boards are categorized by topics known as threads, which feature  
42 questions, observations or conversations points. Online forums have provided users with  
43 more 'democratic' landscapes where they can share spontaneous narratives. These  
44 narratives represent a rich collection of emotional discourse, which are ideally suited for  
45 qualitative analysis, because this is where the tension between the lived experiences of  
46 medicine, healthcare, hidden curriculum, learning, expectations, behaviours and their  
47 interpretations exist. Commenters may reply to the original thread and to each other in text  
48  
49  
50  
51  
52  
53  
54  
55  
56  
57  
58  
59  
60

1  
2  
3  
4 format on these discussion boards, which result in records that can be downloaded. We  
5  
6 examined original postings and response posts from Premed 101  
7  
8 (<http://forums.premed101.com/>), a Canadian website, and Student Doctor Network(SDN)  
9  
10 (<http://www.studentdoctor.net/>), an American website, specifically looking for threads  
11  
12 pertinent to the development of cynicism. These two forums are the most widely used  
13  
14 discussion forums among medical professionals in their respective countries, which was  
15  
16 why they were chosen for analysis in this study. In order to identify threads for analysis,  
17  
18 we used a purposeful sampling strategy, and a study member (JZP) completed a  
19  
20 preliminary scan of discussion forum content and posts from 2010 to 2016 for relevance to  
21  
22 the study topic. Based on the initial scan and most common terms noted in relevant threads,  
23  
24 a keyword search was then conducted to locate additional threads and posts using the  
25  
26 following search terms: ‘cynicism’, ‘empathy’, ‘mental health’, and ‘medical school stress.’  
27  
28 Once the preliminary review was complete, the team met to discuss forum content and  
29  
30 select threads for inclusion based on relevance to the topic. Following this initial selection,  
31  
32 threads were examined in a stepwise fashion with the understanding that the final sample  
33  
34 size would be determined by the analytical requirement of data saturation and that  
35  
36 additional threads would be reviewed as required.<sup>22</sup> We progressed gradually through  
37  
38 analysis until no new ideas could be derived from the review of successive data and the  
39  
40 collection of new data did not offer further insight on the topic.<sup>23</sup> At this point, theoretical  
41  
42 sufficiency was reached and data collection was complete.<sup>24</sup> Data was imported into  
43  
44 NVivo11 (QSR International) to facilitate data management.  
45  
46  
47  
48  
49  
50  
51

52 We used a qualitative approach to perform inductive content analysis to identify the  
53  
54 key themes in the discussion threads. During analysis, data was examined repeatedly in  
55  
56  
57  
58  
59  
60

1  
2  
3  
4 order to discern patterns and themes.<sup>25,26</sup> The process of coding the data and recognizing the  
5  
6 overarching themes and subthemes involved three main stages: open coding, axial coding,  
7  
8 and selective coding.<sup>27,28</sup> First, two researchers trained in qualitative methods (JZP and CC)  
9  
10 reviewed the data independently, line-by-line, to identify patterns and generate a set of  
11  
12 preliminary codes.<sup>26</sup> The researcher team (JZP, CC and AD) then met to discuss initial  
13  
14 impressions of the data and the preliminary codes. Second, during the axial coding phase  
15  
16 the code set was revised, refined, and regrouped into themes, highlighting areas of  
17  
18 similarity and differences. The research team (JZP, CC and AD) assembled during this  
19  
20 phase of analysis to review and discuss the axial coding. Finally, during selective coding, a  
21  
22 general description of the research topic was formulated and the central phenomenon was  
23  
24 constructed from the data. Codes were re-organized around unified themes. At this final  
25  
26 stage, the research team (JZP, CC and AD) met to discuss themes, review the selected  
27  
28 quotes, and establish concurrence. JZP and CC also searched threads for positive deviants  
29  
30 that challenged existing themes. The trustworthiness of our findings was enhanced through  
31  
32 the use of multiple independent coders, and team consensus building discussions at all three  
33  
34 phases of coding. We conceptualized the varied perspectives of the research team members  
35  
36 as an essential component of the interpretive process. The research team also maintained a  
37  
38 detailed audit-trail of all coding and data-related decision making.  
39  
40  
41  
42  
43  
44

#### 45 *Ethical Considerations*

46  
47  
48 The Children's Hospital of Eastern Ontario Research Ethics Board approved this  
49  
50 research protocol prior to study commencement. While individual-level informed consent  
51  
52 was not required for the analysis of aggregate data, we elicited permission from individual  
53  
54 commenters prior to including direct quotations of comments or posting in the discussion  
55  
56  
57  
58  
59  
60

1  
2  
3  
4 threads. These select commenters were contacted privately via direct message to seek  
5  
6 permission to include their anonymized quote in study publications and materials, and all  
7  
8 commenters were given the opportunity to review their quote prior to its inclusion.  
9

### 10 *Patient and Public Involvement*

11  
12 Patients and the public were not involved in the design or conduct of the study; however a  
13  
14 link to this article will be posted to both the Premed 101 and SDN discussion boards upon  
15  
16 publication.  
17  
18

## 19 **RESULTS**

20  
21 A total of 511 posts from 7 discussion threads in Premed 101 and SDN were  
22  
23 included in analysis (See Table 1). A total of 205 posters participated in these discussion  
24  
25 forums. Commenters self-identified as medical students, residents, and faculty staff,  
26  
27 although not all commenters stated their level of training. Two posters were from other  
28  
29 career backgrounds such as pharmacy and dentistry. We constructed three overarching  
30  
31 themes and six sub-themes in our analysis. (See Table 2)  
32  
33

### 34 **1. The challenges inherent to the hierarchal and demanding nature of medicine**

35  
36 A common discussion topic in the online forums was the challenging nature of  
37  
38 medicine and medical training. The following sub-themes were recognized: *the progression*  
39  
40 *of cynicism over time in medical training; reinforcement of hierarchy in medicine that*  
41  
42 *creates a challenging work environment; and the pressure to work long hours and high*  
43  
44 *demands in medicine.* Interestingly, there was widespread consensus that empathy declined  
45  
46 and cynicism increased during the medical training process and no positive deviants were  
47  
48 noted.  
49  
50

#### 51 *1A. The progression of cynicism over time in medical training*

1  
2  
3  
4 There was consensus that the loss of idealism in medicine and feelings of cynicism  
5  
6 occurred during the course of training from student to physician. Discussion posts  
7  
8 emphasized that this occurs when patients are seen as a diagnosis rather than as people and  
9  
10 as trainees become clinicians who prioritize efficient practice.  
11  
12

13 Although trainees are exposed to the physical and mental struggles faced by patients  
14  
15 on a daily basis, the discussion groups revealed that this aspect of the clinical environment  
16  
17 seemed to contribute less in creating cynicism. Rather than long work hours and a heavy  
18  
19 workload, trainees expressed that perception of their low rank, worthlessness, and  
20  
21 disrespect from mentors led to emotional neutralization. Consequently, they highlighted  
22  
23 that time points in which cynicism predominates are transitions from pre-clerkship to  
24  
25 clerkship and beyond. Cynicism was portrayed as a “staircase” that the trainee climbs  
26  
27 during their career path rather than sporadic changes in attitude from individual clinical  
28  
29 encounters. As students become more exposed to “real doctoring” in the clinical setting,  
30  
31 cynicism may be a coping mechanism designed to protect oneself from hardships that one  
32  
33 observes and experiences during medical training.  
34  
35  
36  
37

38  
39 “I personally know folks that are more jaded and clinical thinking now. People are  
40  
41 less than people.... more a diagnosis.” (Thread 2)

42  
43 “I think there is a major shift in cynicism throughout medical school.... There’s an  
44  
45 even bigger increase in cynicism as you go through clerkship. Hours are long, call is  
46  
47 frequent, and you are always the low-person on the totem pole rotating into an  
48  
49 unfamiliar specialty/ward. You also start to really experience the widespread  
50  
51 dysfunction in medicine, and finally get lots of 1 on 1 time with bitter  
52  
53 interns/residents/staff. You will probably get treated like crap by a higher-up at least  
54  
55 once, if not frequently.” (Thread 7)  
56  
57

#### 58 59 *1B. Reinforcement of hierarchy in medicine that creates a challenging work environment* 60

1  
2  
3  
4 Medical students and clerks were in agreement that some of the greatest challenges  
5 they faced stemmed from the learning environment in the clinical context rather than the  
6 formal requirements of content and curriculum. Professional training was described as  
7 being cut throat and competitive, hindered by administrative policies, long hours, and the  
8 need to constantly maintain high level performance. Posters addressed the work culture  
9 challenges of residency that contributed to an overarching sense of not being respected or  
10 valued, including having limited control over scheduling, exposure to challenging  
11 colleagues and situations, and a general lack of recognition and support. It was believed  
12 that long work hours were a symptom of larger cultural problems in medical education  
13 rather than the root cause of the negative experiences.  
14  
15  
16  
17  
18  
19  
20  
21  
22  
23  
24  
25  
26

27 “That said, work hours are a symptom of the main problem: the attitude in medicine  
28 that treats residents (and to a lesser extent staff physicians and medical students)  
29 like they somehow don't have the same human needs as everyone else. Long work  
30 hours, lack of schedule control, lack of appreciation, and all the other forms of  
31 disrespect you list.” (Thread 7)  
32  
33

34 “Except what most people don't realize is the insane amount of unnecessary  
35 bureaucracy, unprofessional behaviour by superiors that goes unchecked, and  
36 sometimes toxic culture of the "Dedicate it all and to nothing else, or you are a  
37 "slacker"/"loser"" type etc.” (Thread 6)  
38  
39

#### 40 *1C. Pressure to work long hours and high demands for efficiency*

41

42 Sleep deprivation was repeatedly noted among students and residents as a major  
43 reason for feeling unhappy during training. Trainees shared a sample of their schedule,  
44 where working in the hospital often meant staying for long hours and subsequently arriving  
45 at early times for the following day.  
46  
47  
48  
49  
50

51 “Vampirish and inhumane hours, 12-15 hour days or staying up all night and then  
52 (if you're lucky) sleeping a few restless hours during the day only to then go do it  
53 the next day/night, 6 or 7 days a week, for 3-7 years.” (Thread 1)  
54  
55  
56  
57  
58  
59  
60

1  
2  
3  
4  
5 The reported consequence of devoting the majority of one's clinical hours to  
6 meeting the demands of medical training included the breakdown of interpersonal  
7 relationships outside of the hospital. Trainees felt isolated, as they felt it challenging to  
8 have social interactions when work hour demands are rigorous. Students, residents and staff  
9 described this barrier as a cause of personal grief and feelings of isolation, which may  
10 contribute towards cynicism in all stages of medical training.  
11  
12  
13  
14  
15  
16  
17  
18

19 "Above all, the breakdown of old relationships and the inability to form new ones...  
20 I don't think age takes the sting off of any of these." (Thread 1)  
21

22 Another conflict shared by trainees pertained to wanting to meet staff demands  
23 while simultaneously balancing the amount of time spent directly with patients. For  
24 example, in order to get work done in time for rounds, some patient needs were bypassed.  
25 Several trainees expressed that the desire for efficiency and pleasing staff resulted in the  
26 objectification of patients and eventual loss of compassion.  
27  
28  
29  
30  
31  
32  
33

34 Posts have attributed this desire for efficiency as a healthcare system issue that aims  
35 to quickly move patients in and out of hospitals. Commenters emphasized that doctors start  
36 out as genuine, but become jaded after trying to keep up with the highly demanding system  
37 for long periods of time.  
38  
39  
40  
41  
42

43 "...we all want to be "good doctors", do the right thing. The sad thing is that after a  
44 year or two of 1/4 call, where your worth as a person is determined by how quickly  
45 and efficiently you can keep the system moving, all of that goes out the window. It  
46 is a broken system that makes broken doctors." (Thread 7)  
47  
48

49 "It's definitely happened to me as a clerk and in the first few months of residency,  
50 especially on off-service rotations, but on-service too, where I just haven't had the  
51 time or the energy to do things for patients that I really would like to be able to do."  
52 (Thread 7)  
53  
54

## 55 2. The challenge of safeguarding well-being 56 57 58 59 60



1  
2  
3  
4 The desire to maintain a sense of balance and well-being, professionally and  
5 personally, was a topic of discussion in the online boards. The following sub-themes were  
6 recognized: *the lack of support as a major stressor*, and *the consequences of cynicism on*  
7 *physician well-being and patient care*.  
8  
9  
10  
11  
12

#### 13 2A. Lack of support as a major stressor

14  
15 Overall, residents described feeling undervalued for their work in hospitals. In some  
16 instances, residents pointed out that their pay did not correspond to the high stress  
17 environment that they were constantly working in, as well as the long, unpredictable hours.  
18 These sentiments were expressed in both the Canadian and American contexts on the online  
19 discussion forums. The sense of inadequate support also seemed to stem from a sense of  
20 impaired autonomy over work and personal life schedules, constantly having to relocate  
21 and adapt to working in unfamiliar and new environments, and general isolation due to  
22 work commitment. Posts repeatedly highlighted how aspects of residency training  
23 neglected “basic human needs” and failed to consider trainees’ personal wellbeing due to  
24 prioritizing work needs.  
25  
26  
27  
28  
29  
30  
31  
32  
33  
34  
35  
36  
37

38 “After all, surgical have the same requirements for a healthy lifestyle as other  
39 residents, despite the occasional assertion to the contrary. Surgeons still need to  
40 sleep, eat, exercise, socialize and spend time with their families, just like everyone  
41 else.” (Thread 7)  
42  
43

44 Several medical students discussed lacking support in terms of the discordance  
45 between meeting their attending’s demands and their syllabus expectations. Students  
46 repeatedly emphasized their “low status on the totem pole” in the clinical environment, and  
47 felt that this lowly status instilled a hesitance to advocate for change due to fear of poor  
48 evaluations or seeming unprofessional if reported to the clerkship director. Students also  
49  
50  
51  
52  
53  
54  
55  
56  
57  
58  
59  
60

1  
2  
3  
4 emphasized that advocating for improvement seemed futile as they cannot resign from the  
5  
6 job of a medical student if they are truly unhappy during a placement, and would rather  
7  
8 tolerate mistreatment than risk poor judgment from preceptors.  
9

## 10 11 12 13 *2B. Consequences of cynicism on physician well-being and patient care*

14  
15  
16 A common theme across discussion boards was the consequences of progressive  
17  
18 cynicism throughout medical training, which likely had a negative impact on physician  
19  
20 career satisfaction, the quality of patient care, and the quality of mentorship for future  
21  
22 generations. Many also highlighted the intergenerational transmission of norms and how  
23  
24 unhappy doctors tend to produce more unhappy doctors.  
25

26  
27 Medical trainee mental health was raised in a number of discussion threads related  
28  
29 to career satisfaction. Commenters noted the high rate of poor mental health documented  
30  
31 among medical students and residents compared to other professions. However, several  
32  
33 students and residents were hesitant to seek help because they feared that this would be  
34  
35 perceived as a sign of “weakness” in a field where professionalism and perseverance are  
36  
37 highly valued. Overall, commenters felt that contributing factors to poor mental health  
38  
39 should be addressed rather than criticizing individuals who suffer in order to promote  
40  
41 changes in attitude in the medical profession.  
42  
43  
44

45  
46 Acknowledging cynicism in medical school also prompted individuals in the  
47  
48 discussion groups to recognize the implications of mentorship. They advocated for the need  
49  
50 for more focus on the consequences of cynicism in medicine. Posts praised the existence of  
51  
52 forums that discussed the nature of cynicism in medicine, acknowledging that open  
53  
54 dialogue and information sharing can support change, such as creating more informed pre-  
55  
56  
57  
58  
59  
60

1  
2  
3  
4 med students, promoting mental health programs in medical schools and residency, and  
5  
6 working towards improving work environments rather than perpetuating shame in  
7  
8  
9 medicine.

10  
11 “Even at your (our) early stage of training, your actions and attitudes help to shape  
12 the culture in medicine. Please, help move it in the right direction, away from  
13 blaming the victim and towards fixing the problems that caused the harm in the first  
14 place.” (Thread 6)

15  
16  
17 **3. The culture of tolerance of unprofessional behaviours throughout training and across**  
18  
19 **generations**

20  
21 Commenters felt that unprofessional work environments in medicine were slow to  
22  
23 change due to the stigma among students and residents that feeling overwhelmed is an  
24  
25 indication of being inadequate. Unprofessional behavior in this context typically referred to  
26  
27 a lack of respect that trainees received from supervisors and trying to meet high demands in  
28  
29 medicine that may compromise good patient care. Consequently, trainees are afraid to seek  
30  
31 help or admit to being overworked in an environment where individuals are typically very  
32  
33 high-achievers and set high expectations for themselves and their colleagues. The  
34  
35 perpetuation of stressful work environments may be due to transmission of norms, namely  
36  
37 preceptors normalizing the challenges they experienced in their formative years and then  
38  
39 maintaining similar conditions for their trainees.  
40  
41  
42  
43

44  
45 “I’ve seen so many residents embrace the attitude in this weird form of quasi-  
46 Stockholm Syndrome, where they downplay, excuse, or even support the negative  
47 aspects of being a resident all while their quality of life suffers. I understand it as a  
48 coping mechanism, but it keeps that attitude alive for the next generation of  
49 residents.” (Thread 7)

50  
51 “A culture in medicine that reflexively defends the sucky parts of medicine as  
52 necessary or desirable isn’t a culture that’s likely to promote change.” (Thread 7)

1  
2  
3  
4 Students and trainees acknowledged that the harsh work environment and lack of respect  
5  
6 posed a greater challenge than solely long work hours. However, the culture to prevail and  
7  
8 achieve in medicine was again brought up as the reason for continued silence.  
9

10  
11 “It is the med-school culture. There is little support. Students just don't admit how  
12 hard it is. There is an unsaid stigma that feeling stressed/overwhelmed/exhausted/or  
13 hurt makes one "weak" in medical school.” (Thread 5)  
14

15  
16 Ultimately, the consequence of defending a culture that pushes for high efficiency and  
17  
18 achievements at the expense of the individual's wellbeing was viewed as a barrier to  
19  
20 progress in medical education.  
21

22  
23 “It is still so difficult for people in medicine to open up about their struggles. When  
24 these disclosures are met with criticism, it encourages everyone else who may be  
25 unhappy with their situation to continue to suffer in silence.” (Thread 6)  
26  
27

## 28 **DISCUSSION**

29  
30 Our analysis of discussion posts exploring cynicism by Canadian and American  
31  
32 medical students, residents, and faculty members emphasized three key findings: 1) the  
33  
34 challenges inherent to the hierarchal and demanding nature of medicine; 2) the need to  
35  
36 safeguard well-being; and 3) the culture of tolerance of unprofessional behaviors.  
37  
38

39  
40 Results from previous studies have not made a definitive conclusion on whether  
41  
42 empathy declines as medical students enter their clinical year of training. While some  
43  
44 studies note that the first drastic decline in empathy and loss of idealization occurs in third  
45  
46 year of medical school, others have suggested that changes in empathy levels do not differ  
47  
48 significantly as medical students and residents progress in their training.<sup>16,29,30,31,32,33</sup> Our  
49  
50 analysis of online discussion forums supports the notion that the loss of empathy and  
51  
52 development of cynicism are progressive in nature and evolve largely during the transition  
53  
54  
55  
56  
57  
58  
59  
60

1  
2  
3  
4 from pre-clerkship to clerkship. This may occur because clerkship students are faced with  
5 similar clinical challenges and ethical dilemmas as the rest of the medical team, but have a  
6 minimal authoritative role. Being in this position makes students more vulnerable to  
7 influences by their mentors, and students may feel conflicted when their personal values of  
8 “good doctoring” do not align with preceptors’ practices of “real doctoring.” Our results  
9 align with other studies demonstrating that the hierarchal nature of medicine and poor role  
10 modeling can create unprofessional work environments and increased stress on trainees.  
11 This unprofessionalism may be more distressing than frequent exposure to traumatic  
12 clinical cases.<sup>8,34,35</sup>

13  
14  
15  
16  
17  
18  
19  
20  
21  
22  
23  
24  
25 Testerman et al. have proposed two models for the development of cynicism: 1) the  
26 intergenerational model, where a student’s cynicism occurs progressively as a coping  
27 mechanism to mistreatment by cynical residents and staff, and 2) the professional identity  
28 model that suggests cynicism among trainees declines as individuals attain a higher  
29 authoritative position and become more confident in dealing with the contradicting values  
30 of the formal and hidden curriculum.<sup>12</sup> Testerman et al. supported the professional identity  
31 model because they noted a decline in cynicism among staff who achieved a “professional  
32 identity,” as compared to residents and students. Results from our study, however, seem to  
33 favor the intergenerational model, as residents describe being more cynical during  
34 residency when compared to medical school, and attribute this progression to a “staircase”  
35 that one climbs throughout training. This conceptualization of the development and  
36 progression of cynicism was also noted in a study by Griffith et al, as within the first 5  
37 months of postgraduate training, residents perceived their patients with less idealistic  
38 values.<sup>36</sup>

1  
2  
3  
4 Research has linked elements of the hidden curriculum to the development of  
5  
6 cynicism. In a study of internal medicine residents, Billings ME et al. demonstrated that the  
7  
8 hidden curriculum, and specifically unprofessional behavior from colleagues, nurses, and  
9  
10 patients, correlated with residents' level of depersonalization, emotional exhaustion, and  
11  
12 level of cynicism.<sup>37</sup> Similar to our findings, residents from this study also attributed  
13  
14 belittlement from staff, lack of control over scheduling, loss of autonomy in the clinical  
15  
16 setting, and poor work relationships as factors that led to burnout. Increasing cynicism  
17  
18 among residents parallels the pattern of increasing cynicism among medical students; both  
19  
20 medical students and residents start medical school and internship with higher empathy and  
21  
22 lower emotional distress, but experience a decline in empathy overtime.<sup>7,29</sup> Our findings  
23  
24 suggest that there may be a “double hit” scenario, where trainees are most vulnerable to  
25  
26 increased cynicism when transitioning to clerkship, and then again when transitioning to  
27  
28 residency. It has been posited that this may be a protective mechanism at times of  
29  
30 transition.<sup>14,15</sup>

31  
32  
33  
34  
35  
36 Emotional neutralization, a consequence of cynicism, carries a negative connotation  
37  
38 during the early medical training process. That said, practicing physicians view emotional  
39  
40 neutralization as a coping mechanism to sustain the various clinical, hierarchal, and system  
41  
42 challenges that one faces in medicine.<sup>38</sup> Our findings support that cynicism occurs when  
43  
44 trainees cope to safeguard their personal wellbeing in a highly demanding work  
45  
46 environment. The impact of cynicism among physicians is substantial; consequences  
47  
48 include a decline in professionalism, burnout, and a loss of empathy that can ultimately  
49  
50 jeopardize patient care.<sup>1,37,39</sup> In order to mitigate these consequences, an understanding of  
51  
52 how and why cynicism develops is key. Online forums provide a holistic view into this  
53  
54  
55  
56  
57  
58  
59  
60

1  
2  
3  
4 topic by presenting diverse perspectives from geographically dispersed individuals, and  
5  
6 across the spectrum of training and practice.  
7

8  
9 As emphasized in previous studies, our findings also support the importance of role  
10 modeling and mentorship in addressing cynicism and the hidden curriculum.<sup>40,41,42,43,44</sup>  
11  
12 Students and residents seek inspiration from mentors and experience more idealism when  
13 they identify positive role models.<sup>7,45</sup> On the other hand, the lack of positive role models,  
14  
15 such as being taught by cynical residents and staff, facilitated the development of cynicism  
16 and a decline in empathy among medical students.<sup>1,37,46</sup> Results from our study support the  
17  
18 notion that mentorship and positive role modeling should be made available throughout  
19  
20 medical training, such that professional attitudes and support can be passed on from staff to  
21  
22 trainees. Mentorship structures should be reinforced during the transition period from pre-  
23  
24 clerkship to clerkship, and from medical school to residency, as these seem to be key  
25  
26 moments when there is a potential increase in cynicism and decline in empathy. While the  
27  
28 concept of mentorship in reducing cynicism is not a novel recommendation, this study  
29  
30 highlights that although issues pertaining to the hidden curriculum have been  
31  
32 acknowledged in the medical literature, they continue to persist in daily medical culture.  
33  
34  
35  
36  
37  
38  
39  
40

41 A major strength of this study design is that online discussion forums allow for a  
42  
43 greater understanding of the hidden curriculum at an international level due to the ease of  
44  
45 access to forums by users from Canada and the USA. That said, given the we were unable  
46  
47 to isolate the geographical location of posters, this study does not allow for a detailed  
48  
49 commentary on potential areas of congruence or divergence between nations. Over the last  
50  
51 10 years, there has been increasing evidence from studies done at single academic  
52  
53 institutions that cynicism progresses from non-clinical to clinical years.<sup>2,11,14,15</sup> Our study  
54  
55  
56  
57  
58  
59  
60

1  
2  
3  
4 expands on this idea and may carry greater external validity given that the viewpoints from  
5  
6 discussion forums reflect those of individuals from several institutions, levels of training,  
7  
8 and specialties. The capacity for user anonymity on forums promotes dynamic interactions  
9  
10 between individuals with lower risk of consequence. These forums create a democratic  
11  
12 space for sharing emotionally powerful experiences that highlight the tension between the  
13  
14 realities of medicine as influenced by the hidden curriculum and personal expectations of  
15  
16 good doctoring. Online discussion forums can also minimize social desirability response  
17  
18 bias, which may be present in other qualitative methods that involve face-to-face  
19  
20 interaction with peers and colleagues, such as focus groups involving staff, residents, and  
21  
22 medical students. In a discussion forum, the hierarchal nature of medicine is minimized  
23  
24 such that the pressure to respond in a manner perceived as acceptable or one that aligns  
25  
26 with the dominant discourse are lessened.  
27  
28  
29  
30  
31

32 Our study has some notable limitations. Contributors to discussion forums may be  
33  
34 biased towards individuals who use forums to discuss their concerns and provide support  
35  
36 for others on the site. Discussion posters in this study may comprise of individuals that feel  
37  
38 more vulnerable and are reaching out anonymously for this reason, and they may in fact be  
39  
40 more cynical than the general medical community. Although commenters on the discussion  
41  
42 boards did not identify their country of origin, we assume that most commenters are  
43  
44 residents of either the United States or Canada, reflecting North American medical practice.  
45  
46 Additionally, our purposeful sampling and selection strategy of threads for inclusion in  
47  
48 analysis could have introduced bias. For example, by selecting threads that explicitly  
49  
50 examined cynicism, we may have inadvertently excluded threads containing divergent or  
51  
52 opposing views. Finally, we obtained agreement from discussion board commenters  
53  
54  
55  
56  
57  
58  
59  
60



1  
2  
3  
4 retrospectively to include their verbatim quotes. This limited our sample of quotes for  
5  
6 inclusion as some commenters may not have been active on the discussion boards at the  
7  
8 time we contacted them and did not reply to our request for permission. In those instances,  
9  
10 the content of postings was summarized and described but the verbatim quotes could not be  
11  
12 included for publication.  
13  
14

15  
16 Ultimately, cynicism among doctors has been shown to affect the quality of patient  
17  
18 care.<sup>47,48</sup> Addressing and acknowledging cynicism as a main theme of the hidden  
19  
20 curriculum can serve as an initial step in establishing true patient centered care.  
21  
22

## 23 **CONCLUSION**

24  
25 Online discussion groups have the potential to provide unique insight into the  
26  
27 culture of medical training. Our findings highlight that exposure to the differing values of  
28  
29 the formal and hidden curriculum seems to impact cynicism in trainees at all stages of  
30  
31 learning, and particularly at transition points. Interventions that can help reduce cynicism  
32  
33 could focus on decreasing the gap between the formal and hidden curriculum that is passed  
34  
35 on through stages of medical training. Examples of such interventions include mentorship  
36  
37 and positive role modeling, especially at transition periods from pre-clerkship to clerkship  
38  
39 and from medical school to residency. Future studies could explore perceptions and  
40  
41 attitudes among trainees at key transition points to further examine how cynicism evolves  
42  
43 between various stages of training.  
44  
45  
46  
47  
48  
49

50 *Contributors:* JP contributed to the acquisition, data analysis, interpretation and drafting of  
51  
52 the project. CC contributed to the design, data analysis and interpretation of the work, and  
53  
54 revised the manuscript for important intellectual content. AD contributed to the design, data  
55  
56  
57  
58  
59

1  
2  
3  
4 analysis and interpretation of the work, and revised the manuscript for important  
5  
6 intellectual content. All authors approved the final manuscript for publication.  
7

8  
9 *Acknowledgements:* None

10  
11 *Funding:* This research received no specific grant from any funding agency in the public,  
12 commercial, or not-for-profit sectors  
13

14  
15 *Conflicts of Interest:* None

16  
17 *Ethical Approval:* This study was approved by the Children's Hospital of Eastern Ontario  
18 Research Institute Research Ethics Board (ref 16/31X).  
19

20  
21 Data: Raw data is available by replicating our search strategy in the following discussion  
22 groups: <https://www.studentdoctor.net/> and <http://forums.premed101.com/>.  
23

## 24 REFERENCES:

- 25  
26 1. Brazeau CM, Schroeder R, Rovi S, Boyd L. Relationships between medical student  
27 burnout, empathy, and professionalism climate. *Acad Med* 2010; 85: S33-S36.  
28
- 29  
30 2. Lempp H, Seale C. The hidden curriculum in undergraduate medical education:  
31 qualitative study of medical students' perceptions of teaching. *BMJ* 2004; 329: 770-3.  
32
- 33  
34 3. Hafferty FW. Beyond curriculum reform: Confronting medicine's hidden  
35 curriculum. *Acad Med* 1998; 73: 403-407.  
36
- 37  
38 4. White CB, Kumagai AK, Ross PT, Fantone JC. A qualitative exploration of how the  
39 conflict between the formal and informal curriculum influences student values and  
40 behaviors. *Acad Med* 2009; 84: 597-603.  
41
- 42  
43 5. West CP, Shanafelt TD. The influence of personal and environmental factors on  
44 professionalism in medical education. *BMC Medical Education* 2007; 7:29.  
45  
46  
47  
48  
49  
50  
51  
52  
53  
54  
55  
56  
57  
58  
59  
60

- 1  
2  
3  
4 6. Hojat M, Vergare M, Maxwell K, Brainard G, Herrine S, Isenberg G, Veloski J,  
5  
6 Gonnella J. The devil is the third year: A longitudinal study of erosion of empathy in  
7  
8 medical school. *Acad Med* 2009; 84: 1182-1191.
- 9  
10  
11 7. Neumann M, Edelhauser F, Tauschel D, Fischer MR, Wirtz M, Woopen C et al.  
12  
13 Empathy decline and its reasons: a systematic review of studies with medical students  
14  
15 and residents. *Acad Med* 2011; 86: 996-1009.
- 16  
17  
18 8. Newton BW, Barber L, Clardy J, Cleveland E, O'Sullivan P. Is there hardening of the  
19  
20 heart during medical school? *Acad Med* 2008; 83: 244-249.
- 21  
22  
23 9. Singh S. Empathy: Lost or Found in Medical Education? *MedGenMed* 2005; 7: 74.
- 24  
25  
26 10. Chen DR, Pahilan ME, Orlander JD. Comparing a self-administered measure of  
27  
28 empathy with observed behavior among medical students. *Journal of General*  
29  
30 *Internal Medicine* 2010; 25: 200-202.
- 31  
32  
33 11. Gaufberg E, Batalden M, Sands R, Bell S. The hidden curriculum: What can we learn  
34  
35 from third-year medical student narrative reflections? *Acad Med* 2010; 85: 1709 –  
36  
37 1716.
- 38  
39  
40 12. Testerman JK, Morton KR, Loo LK, Worthley JS, Lamberton HH. The natural  
41  
42 history of cynicism in physicians. *Acad Med* 1996; 71: S43-S45.
- 43  
44  
45 13. Hojat M, Mangione S, Nasca TJ, Rattner S, Erdmann JB, Gonnella JS et al. An  
46  
47 empirical study of decline in empathy in medical school. *Med Educ* 2004; 38: 934-41.
- 48  
49  
50 14. Bellini LM, Baime M, Shea JA. Variation of mood and empathy during internship.  
51  
52 *JAMA* 2002; 287: 3143-3146.
- 53  
54  
55 15. Bellini LM, Shea JA. Mood change and empathy decline persist during three years of  
56  
57 Internal Medicine Training. *Acad Med* 2005; 80: 164-167.
- 58  
59  
60

- 1  
2  
3  
4 16. Stratta EC, Riding DM, Baker P. Ethical erosion in newly qualified doctors:  
5 perceptions of empathy decline. *Int J Med Educ* 2016; 7: 286 – 92.  
6  
7  
8  
9 17. Sherbino J, Joshi N, Lin M. JGME-ALiEM Hot topics in medical education online  
10 journal club: An analysis of a virtual discussion about resident teachers. *J Grad Med*  
11 *Educ* 2015; 7: 437-44.  
12  
13  
14  
15  
16 18. Makoul G, Zick AB, Aakhus M, Neely KJ, Roemer PE. Using an online forum to  
17 encourage reflection about difficult conversations in medicine. *Patient Educ Couns*  
18 2010; 79: 83-6.  
19  
20  
21  
22  
23 19. Barnett S, Jones SC, Caton T, Iverson D, Bennett S, Robinson L. Implementing a  
24 virtual community of practice for family physician training: a mixed-methods case  
25 study. *J Med Internet Res* 2014; 16: e83.  
26  
27  
28  
29  
30 20. The Number of Unmatched Students Doubled in Carms 2017 [Internet].  
31 Premed101. April 2017 [cited 24 April 2018]. Available from:  
32 [http://forums.premed101.com/topic/95038-the-number-of-unmatched-students-](http://forums.premed101.com/topic/95038-the-number-of-unmatched-students-doubled-in-carms-2017/)  
33 [doubled-in-carms-2017/](http://forums.premed101.com/topic/95038-the-number-of-unmatched-students-doubled-in-carms-2017/)  
34  
35  
36  
37  
38  
39 21. Annual Specialty Competitiveness Stats. [Internet]. Premed101. July 2014 [cited: 24  
40 April 2018]. Available from: [http://forums.premed101.com/topic/78629-annual-](http://forums.premed101.com/topic/78629-annual-specialty-competitiveness-stats/)  
41 [specialty-competitiveness-stats/](http://forums.premed101.com/topic/78629-annual-specialty-competitiveness-stats/)  
42  
43  
44  
45  
46 22. Fusch PI, Ness LR. Are we there yet? Data saturation in qualitative research. *The*  
47 *Qualitative Report* 2015; 20: 1408.  
48  
49  
50  
51 23. Bradley EH, Curry LA, Devers KJ. Qualitative data analysis for health services  
52 research: developing taxonomy, themes, and theory. *Health services research* 2007;  
53 42:1758-1772.  
54  
55  
56  
57  
58  
59  
60

- 1  
2  
3  
4 24. Varpio L, Ajjawi R, Monrouxe LV, O'Brien BC, Rees CE. Shedding the cobra  
5  
6 effect: problematising thematic emergence, triangulation, saturation and member  
7  
8 checking. *Med Educ* 2017; 51: 40-50.  
9  
10  
11 25. Strauss A, Corbin J. Basics of qualitative research: Grounded theory procedures and  
12  
13 techniques. Newbury Park: SAGE Publications 1990.  
14  
15  
16 26. Elo S, Kyngas H. The qualitative content analysis process. *J Adv Nurs* 2008; 62: 107-  
17  
18 115.  
19  
20  
21 27. Bohm A. Theoretical coding: Text analysis in Grounded Theory. (In U Flick, E  
22  
23 Kardorff, I Steinke (Eds.), *A companion to qualitative research* (p 270 – 275).  
24  
25 London: SAGE Publications 2004.  
26  
27  
28 28. Gooden RJ, Windfield HR. Breast and prostate cancer online discussion boards: a  
29  
30 thematic analysis of gender differences and similarities. *Journal of Health*  
31  
32 *Psychology* 2007; 12: 103-114.  
33  
34  
35 29. Ludwig AB, Burton W, Weingarten J, Milan F, Myers DC, Kligler B. Depression and  
36  
37 stress amongst undergraduate medical students. *BMC Med Educ* 2015; 15: 141.  
38  
39  
40 30. Roff S. Reconsidering the “decline” of medical student empathy as reported in  
41  
42 studies using the Jefferson Scale of Physician Empathy-Student version (JSPE-S).  
43  
44 *Med Teach* 2015; 37: 1-4.  
45  
46  
47 31. Bratek A, Buiska W, Bonk M, Seweryn M, Krysta K. Empathy among physicians,  
48  
49 medical students, and candidates. *Psychiatr Danub* 2015; 27: S48-52.  
50  
51  
52 32. Shashikumar R, Chaudhary R, Ryali VS, Bhat PS, Srivastava K, Prakash J, Basannar  
53  
54 D. Cross sectional assessment of empathy among undergraduates from a medical  
55  
56 college. *Med J Armed Forces India* 2014; 70: 179- 85.  
57  
58  
59  
60

- 1  
2  
3  
4 33. Hegazi I, Wilson I. Maintaining empathy in medical school: it is possible. *Med teach*  
5 2013; 35: 1002-8.  
6  
7  
8  
9 34. Haglund M, aan het Rot M, Cooper NS, et al. Resilience in the third year of medical  
10 school: A prospective study of the associations between stressful events occurring  
11 during clinical rotations and student well-being. *Acad Med* 2009; 84: 258-268.  
12  
13  
14  
15 35. Dornan T, Pearson E, Carson P, Helmich E, Bundy C. Emotions and identity in the  
16 figured world of becoming a doctor. *Med Educ* 2015; 49: 174-85.  
17  
18  
19 36. Griffith CH, Wilson JF. The loss of idealism throughout internship. *Eval Health Prof*  
20 2003; 26: 415-426.  
21  
22  
23  
24 37. Billings ME, Lazarus ME, Wenrich M, Curtis JR, Engelberg RA. The effect of the  
25 hidden curriculum on resident burnout and cynicism. *J Grad Med Educ* 2011; 3: 503-  
26 10.  
27  
28  
29  
30 38. Doja A, Bould DM, Clarkin C, Eady K, Sutherland S, Writer H. The hidden and  
31 informal curriculum across the continuum of training: A cross-sectional qualitative  
32 study. *Med Teach* 2016; 38: 410-8.  
33  
34  
35  
36 39. Prins JT, Gazendam Donofrio SM, Tubben BJ, van der Heijden FM, van de Wiel  
37 HB, Hoekstra-Weebers JE. Burnout in medical residents: a review. *Med Educ* 2007;  
38 41: 788-800.  
39  
40  
41  
42 40. McKenna AM, Straus SE. Charting a professional course: A review of mentorship  
43 in medicine. *J Am Coll Radiol* 2011; 8: 109-112.  
44  
45  
46  
47  
48  
49  
50  
51  
52  
53  
54  
55  
56  
57  
58  
59  
60

- 1  
2  
3  
4 41. Straus SE, Johnson MO, Marquez C, Feldman MD. Characteristics of successful  
5 and failed mentoring relationships: A qualitative study across two academic health  
6 centers. *Acad Med* 2013; 88: 82-89.  
7  
8  
9  
10  
11 42. Stamm M, Buddeberg-Fischer B. The impact of mentoring during postgraduate  
12 training on doctors' career success. *Med Educ* 2011; 45: 488-96.  
13  
14  
15 43. Rose GL, Rukstalis MR, Schuckit MA. Informal mentoring between faculty and  
16 medical students. *Acad Med* 2005; 80: 344-8.  
17  
18  
19  
20 44. Howe A. Professional development in undergraduate medical curricula – the key to  
21 the door of a new culture? *Med Educ* 2002; 36: 353-9.  
22  
23  
24 45. Kay J. Traumatic deidealization and the future of medicine. *JAMA* 1990; 263: 572-  
25 573.  
26  
27  
28  
29 46. Greganti MA. Where are the clinical role models? *Arch Intern Med* 1990; 150: 259-  
30 261.  
31  
32  
33 47. Dewa CS, Loong D, Bonato S, Trojanowski L. The relationship between physician  
34 burnout and quality of healthcare in terms of safety and acceptability: a systematic  
35 review. *BMJ Open* 2017; 7: e015141.  
36  
37  
38  
39  
40 48. Bodenheimer T, Sinsky C. From triple to quadruple aim: Care of the patient requires  
41 care of the provider. *Ann Fam Med* 2014; 12: 573-576.  
42  
43  
44  
45  
46  
47  
48  
49  
50  
51  
52  
53  
54  
55  
56  
57  
58  
59  
60

**Table 1: Summary of discussion threads analyzed, discussion forums and country of origin for each thread and the number of posts examined.**

| Thread Name                                                                   | Discussion forum and Country of Origin | Number of posts | Number of posters |
|-------------------------------------------------------------------------------|----------------------------------------|-----------------|-------------------|
| 1. Excessive and unnecessary stress on med students                           | Student Doctor Network – United States | 269             |                   |
| 2. How does med school change a person                                        | Student Doctor Network – United States | 22              |                   |
| 3. My theory on why med students show decline in empathy                      | Student Doctor Network – United States | 46              |                   |
| 4. Why the cynicism                                                           | Student Doctor Network – United States | 54              |                   |
| 5. Mental health in medical school                                            | Student Doctor Network – United States | 29              |                   |
| 6. What they don't tell you before getting into medicine                      | Premed101 – Canada                     | 42              |                   |
| 7. Is it possible to finish med school without becoming too salty or cynical? | Premed101 – Canada                     | 49              |                   |

**Table 2 Themes and subthemes from discussion group analysis**

| Themes of the Hidden Curriculum                                                                    | Pertinent subthemes                                                                                                                                                                                         |
|----------------------------------------------------------------------------------------------------|-------------------------------------------------------------------------------------------------------------------------------------------------------------------------------------------------------------|
| <b>Challenges inherent to the hierarchal and demanding nature of medicine</b>                      | <i>The progression of cynicism over time</i><br><i>The reinforcement of hierarchy that creates an unpleasant work environment</i><br><i>The pressure to work long hours and high demands for efficiency</i> |
| <b>Challenges of safeguarding well-being</b>                                                       | <i>Lack of support as a major stressor</i><br><i>Consequences of cynicism on physician well-being and patient care</i>                                                                                      |
| <b>Culture of tolerance of unprofessional behaviors throughout training and across generations</b> |                                                                                                                                                                                                             |



## COREQ (COnsolidated criteria for REporting Qualitative research) Checklist

A checklist of items that should be included in reports of qualitative research. You must report the page number in your manuscript where you consider each of the items listed in this checklist. If you have not included this information, either revise your manuscript accordingly before submitting or note N/A.

| Topic                                          | Item No. | Guide Questions/Description                                                                                                                              | Reported on Page No. |
|------------------------------------------------|----------|----------------------------------------------------------------------------------------------------------------------------------------------------------|----------------------|
| <b>Domain 1: Research team and reflexivity</b> |          |                                                                                                                                                          |                      |
| <i>Personal characteristics</i>                |          |                                                                                                                                                          |                      |
| Interviewer/facilitator                        | 1        | Which author/s conducted the interview or focus group?                                                                                                   |                      |
| Credentials                                    | 2        | What were the researcher's credentials? E.g. PhD, MD                                                                                                     |                      |
| Occupation                                     | 3        | What was their occupation at the time of the study?                                                                                                      |                      |
| Gender                                         | 4        | Was the researcher male or female?                                                                                                                       |                      |
| Experience and training                        | 5        | What experience or training did the researcher have?                                                                                                     |                      |
| <i>Relationship with participants</i>          |          |                                                                                                                                                          |                      |
| Relationship established                       | 6        | Was a relationship established prior to study commencement?                                                                                              |                      |
| Participant knowledge of the interviewer       | 7        | What did the participants know about the researcher? e.g. personal goals, reasons for doing the research                                                 |                      |
| Interviewer characteristics                    | 8        | What characteristics were reported about the interviewer/facilitator? e.g. Bias, assumptions, reasons and interests in the research topic                |                      |
| <b>Domain 2: Study design</b>                  |          |                                                                                                                                                          |                      |
| <i>Theoretical framework</i>                   |          |                                                                                                                                                          |                      |
| Methodological orientation and Theory          | 9        | What methodological orientation was stated to underpin the study? e.g. grounded theory, discourse analysis, ethnography, phenomenology, content analysis |                      |
| <i>Participant selection</i>                   |          |                                                                                                                                                          |                      |
| Sampling                                       | 10       | How were participants selected? e.g. purposive, convenience, consecutive, snowball                                                                       |                      |
| Method of approach                             | 11       | How were participants approached? e.g. face-to-face, telephone, mail, email                                                                              |                      |
| Sample size                                    | 12       | How many participants were in the study?                                                                                                                 |                      |
| Non-participation                              | 13       | How many people refused to participate or dropped out? Reasons?                                                                                          |                      |
| <i>Setting</i>                                 |          |                                                                                                                                                          |                      |
| Setting of data collection                     | 14       | Where was the data collected? e.g. home, clinic, workplace                                                                                               |                      |
| Presence of non-participants                   | 15       | Was anyone else present besides the participants and researchers?                                                                                        |                      |
| Description of sample                          | 16       | What are the important characteristics of the sample? e.g. demographic data, date                                                                        |                      |
| <i>Data collection</i>                         |          |                                                                                                                                                          |                      |
| Interview guide                                | 17       | Were questions, prompts, guides provided by the authors? Was it pilot tested?                                                                            |                      |
| Repeat interviews                              | 18       | Were repeat interviews carried out? If yes, how many?                                                                                                    |                      |
| Audio/visual recording                         | 19       | Did the research use audio or visual recording to collect the data?                                                                                      |                      |
| Field notes                                    | 20       | Were field notes made during and/or after the interview or focus group?                                                                                  |                      |
| Duration                                       | 21       | What was the duration of the interviews or focus group?                                                                                                  |                      |
| Data saturation                                | 22       | Was data saturation discussed?                                                                                                                           |                      |
| Transcripts returned                           | 23       | Were transcripts returned to participants for comment and/or                                                                                             |                      |

| Topic                                  | Item No. | Guide Questions/Description                                                                                                        | Reported on Page No. |
|----------------------------------------|----------|------------------------------------------------------------------------------------------------------------------------------------|----------------------|
|                                        |          | correction?                                                                                                                        |                      |
| <b>Domain 3: analysis and findings</b> |          |                                                                                                                                    |                      |
| <i>Data analysis</i>                   |          |                                                                                                                                    |                      |
| Number of data coders                  | 24       | How many data coders coded the data?                                                                                               |                      |
| Description of the coding tree         | 25       | Did authors provide a description of the coding tree?                                                                              |                      |
| Derivation of themes                   | 26       | Were themes identified in advance or derived from the data?                                                                        |                      |
| Software                               | 27       | What software, if applicable, was used to manage the data?                                                                         |                      |
| Participant checking                   | 28       | Did participants provide feedback on the findings?                                                                                 |                      |
| <i>Reporting</i>                       |          |                                                                                                                                    |                      |
| Quotations presented                   | 29       | Were participant quotations presented to illustrate the themes/findings?<br>Was each quotation identified? e.g. participant number |                      |
| Data and findings consistent           | 30       | Was there consistency between the data presented and the findings?                                                                 |                      |
| Clarity of major themes                | 31       | Were major themes clearly presented in the findings?                                                                               |                      |
| Clarity of minor themes                | 32       | Is there a description of diverse cases or discussion of minor themes?                                                             |                      |

Developed from: Tong A, Sainsbury P, Craig J. Consolidated criteria for reporting qualitative research (COREQ): a 32-item checklist for interviews and focus groups. *International Journal for Quality in Health Care*. 2007. Volume 19, Number 6: pp. 349 – 357

**Once you have completed this checklist, please save a copy and upload it as part of your submission. DO NOT include this checklist as part of the main manuscript document. It must be uploaded as a separate file.**

# BMJ Open

## Uncovering cynicism in medical training: A qualitative analysis of medical online discussion forums

|                                 |                                                                                                                                                                                                           |
|---------------------------------|-----------------------------------------------------------------------------------------------------------------------------------------------------------------------------------------------------------|
| Journal:                        | <i>BMJ Open</i>                                                                                                                                                                                           |
| Manuscript ID                   | bmjopen-2018-022883.R2                                                                                                                                                                                    |
| Article Type:                   | Research                                                                                                                                                                                                  |
| Date Submitted by the Author:   | 07-Sep-2018                                                                                                                                                                                               |
| Complete List of Authors:       | Peng, Jenny ; University of Ottawa Faculty of Medicine<br>Clarkin, Chantalle; Children's Hospital of Eastern Ontario Research Institute<br>Doja, Asif; Children's Hospital of Eastern Ontario, Pediatrics |
| <b>Primary Subject Heading</b>: | Medical education and training                                                                                                                                                                            |
| Secondary Subject Heading:      | Qualitative research                                                                                                                                                                                      |
| Keywords:                       | MEDICAL EDUCATION & TRAINING, QUALITATIVE RESEARCH, World Wide Web technology < BIOTECHNOLOGY & BIOINFORMATICS                                                                                            |
|                                 |                                                                                                                                                                                                           |

SCHOLARONE™  
Manuscripts

Peer Review Only

1  
2  
3  
4 **Uncovering cynicism in medical training: A qualitative analysis of medical online**  
5 **discussion forums**  
6  
7

8 **Jenny Peng MD<sup>1</sup>, Chantalle Clarkin RN, PhD<sup>2</sup>, A. Doja MEd, MD<sup>1,3</sup>**  
9

- 10  
11 1. Faculty of Medicine, University of Ottawa, 451 Smyth Rd, Ottawa, ON, K1H 8M5  
12  
13 2. Children's Hospital of Eastern Ontario Research Institute, 401 Smyth Rd, Ottawa,  
14  
15 ON, K1H 8L1  
16  
17 3. Department of Pediatrics, Children's Hospital of Eastern Ontario, 401 Smyth Rd,  
18  
19 Ottawa, ON, K1H 8L1  
20  
21

22 **Corresponding author:** Asif Doja, Department of Pediatrics, Children's Hospital of  
23  
24 Eastern Ontario, 401 Smyth Rd, Ottawa, ON, K1H 8L1, ph: (613) 737-7600, fax: (613)  
25  
26 738-4297, adoja@cheo.on.ca  
27  
28  
29  
30  
31  
32  
33  
34  
35  
36  
37  
38  
39  
40  
41  
42  
43  
44  
45  
46  
47  
48  
49  
50  
51  
52  
53  
54  
55  
56  
57  
58  
59  
60

## ABSTRACT

**OBJECTIVE:** The development of cynicism in medicine, defined as a decline in empathy and emotional neutralization during medical training, is a significant concern for medical educators. We sought to utilize online medical student discussion groups to provide insight into how cynicism in medicine is perceived, the consequences of cynicism on medical trainee development, and potential links between the hidden curriculum and cynicism.

**SETTING:** Online analysis of discussion topics in Premed101 (Canadian) and Student Doctor Network (American) forums.

**PARTICIPANTS:** 511 posts from 7 discussion topics were analyzed using NVivo 11. Participants in the forums included medical students, residents and practicing physicians.

**METHODS:** Inductive content analysis was used to develop a data-driven coding scheme that evolved throughout analysis. Measures were taken to ensure the trustworthiness of findings, including duplicate independent coding of a subsample of posts and the maintenance of an audit trail.

**RESULTS:** Medical students, residents, and practicing physicians participating in the discussion forums engaged in discourse about cynicism and highlighted themes of the hidden curriculum resulting in cynicism. These included the progression of cynicism over the course of medical training as a coping mechanism; the development of challenging work environments due to factors such as limited support, hierarchal demands, and long work hours; and the challenge of initiating change due to the tolerance of unprofessionalism and the highly stressful nature of medicine.

**CONCLUSION:** Our unique study of North American medical discussion posts demonstrates that cynicism develops progressively and is compounded by conflicts

1  
2  
3  
4 between the hidden and formal curriculum. Online discussion groups are a novel resource  
5  
6 to provide insight into the culture of medical training.  
7  
8  
9

## 10 11 **ARTICLE SUMMARY**

12  
13 Strengths and limitations of this study:

- 14  
15 • Strength: online discussion forums are a novel resource to obtain medical trainees'  
16  
17 anonymous perspectives regarding graduate and postgraduate education
- 18  
19 • Strength: online forums allow for dynamic interactions and participation among  
20  
21 individuals from several training sites rather than a single academic institution
- 22  
23 • Limitation: results may represent a subset of individuals who post on online  
24  
25 discussion forums  
26  
27  
28

## 29 30 **INTRODUCTION:**

31  
32 Cynicism, defined as a decline in empathy and emotional neutralization during  
33  
34 medical training, is a continued concern for medical educators. <sup>1,2</sup> One hypothesis to the  
35  
36 development of cynicism among trainees is perceived conflict between the formal and hidden  
37  
38 curriculum, with the hidden curriculum defined as “a set of influences that function at the level of  
39  
40 organizational structure and culture” that impact the perception of medicine and decision making by  
41  
42 medical trainees.<sup>2,3</sup> Conflicts between the formal and hidden curriculum likely occur when  
43  
44 trainees enter the clinical setting and realize the values of patient-centered care are often  
45  
46 challenged by the demanding, time-pressured realities of medicine.<sup>4,5</sup>  
47  
48  
49

50  
51 There remains some debate in the literature on whether empathy wanes and  
52  
53 cynicism escalates as one progresses in training.<sup>6,7,8,9,10</sup> Studies examining the underlying  
54  
55 factors that contribute towards increasing cynicism and declining empathy are mostly  
56  
57  
58  
59  
60

1  
2  
3  
4 qualitative in nature and primarily sample students and residents from a single academic  
5  
6 institution.<sup>2,11,12,13,14,15,16</sup>  
7

8  
9 Online discussion forums are widely popular and have been leveraged to provided  
10  
11 insight into a variety of topics in medical education.<sup>17,18,19</sup> For medical trainees, online  
12  
13 discussion forums such as Premed101 and Student Doctor Network are used to contribute  
14  
15 questions, advice, and opinions regarding issues in medicine (e.g. the residency matching  
16  
17 process, perceived competitiveness of specialties), the training process, and education.<sup>20,21</sup>  
18  
19 This allows for dynamic sharing of information at various levels of medical training in a  
20  
21 safe digital space that can be widely disseminated across institutions and archived for  
22  
23 further participation at multiple time points. These digital forums can serve as unique  
24  
25 resources to better understand trainee cynicism and the hidden curriculum.  
26  
27  
28

29  
30 Our goal was to perform a qualitative content analysis of online medical discussion  
31  
32 forums (Student Doctor Network and Premed101) to explore: trainees' perceptions of  
33  
34 cynicism, when cynicism occurs, whether cynicism is progressive through medical training,  
35  
36 and the factors that enable and constrain the development of cynicism. We also sought to  
37  
38 examine the impact of the hidden curriculum on the development of cynicism.  
39  
40  
41  
42

## 43 **METHODS**

44  
45 Online discussion boards are categorized by topics known as threads, which feature  
46  
47 questions, observations or conversations points. Online forums have provided users with  
48  
49 more 'democratic' landscapes where they can share spontaneous narratives. These  
50  
51 narratives represent a rich collection of emotional discourse, which are ideally suited for  
52  
53 qualitative analysis, because this is where the tension between the lived experiences of  
54  
55  
56  
57  
58  
59  
60

1  
2  
3  
4 medicine, healthcare, hidden curriculum, learning, expectations, behaviours and their  
5  
6 interpretations exist. Commenters may reply to the original thread and to each other in text  
7  
8 format on these discussion boards, which result in records that can be downloaded. We  
9  
10 examined original postings and response posts from Premed 101  
11  
12 (<http://forums.premed101.com/>), a Canadian website, and Student Doctor Network(SDN)  
13  
14 (<http://www.studentdoctor.net/>), an American website, specifically looking for threads  
15  
16 pertinent to the development of cynicism. These two forums are the most widely used  
17  
18 discussion forums among medical professionals in their respective countries, which was  
19  
20 why they were chosen for analysis in this study. In order to identify threads for analysis,  
21  
22 we used a purposeful sampling strategy, and a study member (JZP) completed a  
23  
24 preliminary scan of discussion forum content and posts from 2010 to 2016 for relevance to  
25  
26 the study topic. Based on the initial scan and most common terms noted in relevant threads,  
27  
28 a keyword search was then conducted to locate additional threads and posts using the  
29  
30 following search terms: ‘cynicism’, ‘empathy’, ‘mental health’, and ‘medical school stress.’  
31  
32  
33  
34  
35  
36  
37  
38  
39  
40  
41  
42  
43  
44  
45  
46  
47  
48  
49  
50  
51  
52  
53  
54  
55  
56  
57  
58  
59  
60

Once the preliminary review was complete, the team met to discuss forum content and select threads for inclusion based on relevance to the topic. Following this initial selection, threads were examined in a stepwise fashion with the understanding that the final sample size would be determined by the analytical requirement of data saturation and that additional threads would be reviewed as required.<sup>22</sup> We progressed gradually through analysis until no new ideas could be derived from the review of successive data and the collection of new data did not offer further insight on the topic.<sup>23</sup> At this point, theoretical sufficiency was reached and data collection was complete.<sup>24</sup> Data was imported into NVivo11 (QSR International) to facilitate data management.



1  
2  
3  
4 We used a qualitative approach to perform inductive content analysis to identify the  
5  
6 key themes in the discussion threads. During analysis, data was examined repeatedly in  
7  
8 order to discern patterns and themes.<sup>25,26</sup> The process of coding the data and recognizing the  
9  
10 overarching themes and subthemes involved three main stages: open coding, axial coding,  
11  
12 and selective coding.<sup>27,28</sup> First, two researchers trained in qualitative methods (JZP and CC)  
13  
14 reviewed the data independently, line-by-line, to identify patterns and generate a set of  
15  
16 preliminary codes.<sup>26</sup> The researcher team (JZP, CC and AD) then met to discuss initial  
17  
18 impressions of the data and the preliminary codes. Second, during the axial coding phase  
19  
20 the code set was revised, refined, and regrouped into themes, highlighting areas of  
21  
22 similarity and differences. The research team (JZP, CC and AD) assembled during this  
23  
24 phase of analysis to review and discuss the axial coding. Finally, during selective coding, a  
25  
26 general description of the research topic was formulated and the central phenomenon was  
27  
28 constructed from the data. Codes were re-organized around unified themes. At this final  
29  
30 stage, the research team (JZP, CC and AD) met to discuss themes, review the selected  
31  
32 quotes, and establish concurrence. JZP and CC also searched threads for positive deviants  
33  
34 that challenged existing themes. The trustworthiness of our findings was enhanced through  
35  
36 the use of multiple independent coders, and team consensus building discussions at all three  
37  
38 phases of coding. We conceptualized the varied perspectives of the research team members  
39  
40 as an essential component of the interpretive process. The research team also maintained a  
41  
42 detailed audit-trail of all coding and data-related decision making.  
43  
44  
45  
46  
47  
48  
49

### 50 *Ethical Considerations*

51  
52 The Children's Hospital of Eastern Ontario Research Ethics Board approved this  
53  
54 research protocol prior to study commencement. While individual-level informed consent  
55  
56  
57  
58  
59

1  
2  
3  
4 was not required for the analysis of aggregate data, we elicited permission from individual  
5  
6 commenters prior to including direct quotations of comments or posting in the discussion  
7  
8 threads. These select commenters were contacted privately via direct message to seek  
9  
10 permission to include their anonymized quote in study publications and materials, and all  
11  
12 commenters were given the opportunity to review their quote prior to its inclusion.  
13  
14

### 15 *Patient and Public Involvement*

16  
17 Patients and the public were not involved in the design or conduct of the study; however a  
18  
19 link to this article will be posted to both the Premed 101 and SDN discussion boards upon  
20  
21 publication.  
22  
23

## 24 **RESULTS**

25  
26 A total of 511 posts from 7 discussion threads in Premed 101 and SDN were  
27  
28 included in analysis (See Table 1). A total of 205 posters participated in these discussion  
29  
30 forums. Commenters self-identified as medical students, residents, and faculty staff,  
31  
32 although not all commenters stated their level of training. Two posters were from other  
33  
34 career backgrounds such as pharmacy and dentistry. We constructed three overarching  
35  
36 themes and six sub-themes in our analysis. (See Table 2)  
37  
38  
39  
40

### 41 **1. The challenges inherent to the hierarchal and demanding nature of medicine**

42  
43 A common discussion topic in the online forums was the challenging nature of  
44  
45 medicine and medical training. The following sub-themes were recognized: *the progression*  
46  
47 *of cynicism over time in medical training; reinforcement of hierarchy in medicine that*  
48  
49 *creates a challenging work environment; and the pressure to work long hours and high*  
50  
51 *demands in medicine.* Interestingly, there was widespread consensus that empathy declined  
52  
53  
54  
55  
56  
57  
58  
59  
60

1  
2  
3  
4 and cynicism increased during the medical training process and no positive deviants were  
5  
6 noted.

#### 7 8 9 *1A. The progression of cynicism over time in medical training*

10  
11 There was consensus that the loss of idealism in medicine and feelings of cynicism  
12  
13 occurred during the course of training from student to physician. Discussion posts  
14  
15 emphasized that this occurs when patients are seen as a diagnosis rather than as people and  
16  
17 as trainees become clinicians who prioritize efficient practice.  
18

19  
20 Although trainees are exposed to the physical and mental struggles faced by patients  
21  
22 on a daily basis, the discussion groups revealed that this aspect of the clinical environment  
23  
24 seemed to contribute less in creating cynicism. Rather than long work hours and a heavy  
25  
26 workload, trainees expressed that perception of their low rank, worthlessness, and  
27  
28 disrespect from mentors led to emotional neutralization. Consequently, they highlighted  
29  
30 that time points in which cynicism predominates are transitions from pre-clerkship to  
31  
32 clerkship and beyond. Cynicism was portrayed as a “staircase” that the trainee climbs  
33  
34 during their career path rather than sporadic changes in attitude from individual clinical  
35  
36 encounters. As students become more exposed to “real doctoring” in the clinical setting,  
37  
38 cynicism may be a coping mechanism designed to protect oneself from hardships that one  
39  
40 observes and experiences during medical training.  
41  
42  
43  
44

45  
46 “I personally know folks that are more jaded and clinical thinking now. People are  
47  
48 less than people.... more a diagnosis.” (Thread 2)

49  
50 “I think there is a major shift in cynicism throughout medical school.... There’s an  
51  
52 even bigger increase in cynicism as you go through clerkship. Hours are long, call is  
53  
54 frequent, and you are always the low-person on the totem pole rotating into an  
55  
56 unfamiliar specialty/ward. You also start to really experience the widespread  
57  
58 dysfunction in medicine, and finally get lots of 1 on 1 time with bitter  
59  
60

1  
2  
3  
4 interns/residents/staff. You will probably get treated like crap by a higher-up at least  
5 once, if not frequently.” (Thread 7)  
6  
7

8  
9 *1B. Reinforcement of hierarchy in medicine that creates a challenging work environment*

10  
11 Medical students and clerks were in agreement that some of the greatest challenges  
12 they faced stemmed from the learning environment in the clinical context rather than the  
13 formal requirements of content and curriculum. Professional training was described as  
14 being cut throat and competitive, hindered by administrative policies, long hours, and the  
15 need to constantly maintain high level performance. Posters addressed the work culture  
16 challenges of residency that contributed to an overarching sense of not being respected or  
17 valued, including having limited control over scheduling, exposure to challenging  
18 colleagues and situations, and a general lack of recognition and support. It was believed  
19 that long work hours were a symptom of larger cultural problems in medical education  
20 rather than the root cause of the negative experiences.  
21  
22  
23  
24  
25  
26  
27  
28  
29  
30  
31  
32  
33

34 “That said, work hours are a symptom of the main problem: the attitude in medicine  
35 that treats residents (and to a lesser extent staff physicians and medical students)  
36 like they somehow don't have the same human needs as everyone else. Long work  
37 hours, lack of schedule control, lack of appreciation, and all the other forms of  
38 disrespect you list.” (Thread 7)  
39  
40

41 “Except what most people don't realize is the insane amount of unnecessary  
42 bureaucracy, unprofessional behaviour by superiors that goes unchecked, and  
43 sometimes toxic culture of the "Dedicate it all and to nothing else, or you are a  
44 "slacker"/"loser"" type etc.” (Thread 6)  
45  
46

47 *1C. Pressure to work long hours and high demands for efficiency*

48  
49 Sleep deprivation was repeatedly noted among students and residents as a major  
50 reason for feeling unhappy during training. Trainees shared a sample of their schedule,  
51  
52  
53  
54  
55  
56  
57  
58  
59  
60

1  
2  
3  
4 where working in the hospital often meant staying for long hours and subsequently arriving  
5  
6 at early times for the following day.  
7

8  
9 “Vampirish and inhumane hours, 12-15 hour days or staying up all night and then  
10 (if you're lucky) sleeping a few restless hours during the day only to then go do it  
11 the next day/night, 6 or 7 days a week, for 3-7 years.” (Thread 1)  
12  
13

14  
15 The reported consequence of devoting the majority of one's clinical hours to  
16  
17 meeting the demands of medical training included the breakdown of interpersonal  
18  
19 relationships outside of the hospital. Trainees felt isolated, as they felt it challenging to  
20  
21 have social interactions when work hour demands are rigorous. Students, residents and staff  
22  
23 described this barrier as a cause of personal grief and feelings of isolation, which may  
24  
25 contribute towards cynicism in all stages of medical training.  
26  
27

28  
29 “Above all, the breakdown of old relationships and the inability to form new ones...  
30 I don't think age takes the sting off of any of these.” (Thread 1)  
31

32  
33 Another conflict shared by trainees pertained to wanting to meet staff demands  
34  
35 while simultaneously balancing the amount of time spent directly with patients. For  
36  
37 example, in order to get work done in time for rounds, some patient needs were bypassed.  
38  
39 Several trainees expressed that the desire for efficiency and pleasing staff resulted in the  
40  
41 objectification of patients and eventual loss of compassion.  
42

43  
44 Posts have attributed this desire for efficiency as a healthcare system issue that aims  
45  
46 to quickly move patients in and out of hospitals. Commenters emphasized that doctors start  
47  
48 out as genuine, but become jaded after trying to keep up with the highly demanding system  
49  
50 for long periods of time.  
51

52  
53 “...we all want to be "good doctors", do the right thing. The sad thing is that after a  
54 year or two of 1/4 call, where your worth as a person is determined by how quickly  
55  
56  
57  
58  
59

1  
2  
3  
4 and efficiently you can keep the system moving, all of that goes out the window. It  
5 is a broken system that makes broken doctors.” (Thread 7)  
6

7  
8 “It's definitely happened to me as a clerk and in the first few months of residency,  
9 especially on off-service rotations, but on-service too, where I just haven't had the  
10 time or the energy to do things for patients that I really would like to be able to do.”  
11 (Thread 7)  
12

## 13 **2. The challenge of safeguarding well-being**

14  
15 The desire to maintain a sense of balance and well-being, professionally and  
16 personally, was a topic of discussion in the online boards. The following sub-themes were  
17 recognized: *the lack of support as a major stressor*, and *the consequences of cynicism on*  
18 *physician well-being and patient care*.  
19

### 20 *2A. Lack of support as a major stressor*

21  
22 Overall, residents described feeling undervalued for their work in hospitals. In some  
23 instances, residents pointed out that their pay did not correspond to the high stress  
24 environment that they were constantly working in, as well as the long, unpredictable hours.  
25 These sentiments were expressed in both the Canadian and American contexts on the online  
26 discussion forums. The sense of inadequate support from peers, colleagues and in  
27 particular, supervisors also seemed to stem from a sense of impaired autonomy over work  
28 and personal life schedules, constantly having to relocate and adapt to working in  
29 unfamiliar and new environments, and general isolation due to work commitment. Posts  
30 repeatedly highlighted how aspects of residency training neglected “basic human needs”  
31 and failed to consider trainees’ personal wellbeing due to prioritizing work needs.  
32  
33

34  
35 “After all, surgical have the same requirements for a healthy lifestyle as other  
36 residents, despite the occasional assertion to the contrary. Surgeons still need to  
37 sleep, eat, exercise, socialize and spend time with their families, just like everyone  
38 else.” (Thread 7)  
39  
40  
41  
42  
43  
44  
45  
46  
47  
48  
49  
50  
51  
52  
53  
54  
55  
56  
57  
58  
59  
60

1  
2  
3  
4 Several medical students discussed lacking support in terms of the discordance  
5  
6 between meeting their attending's demands and their syllabus expectations. Students  
7  
8 repeatedly emphasized their "low status on the totem pole" in the clinical environment, and  
9  
10 felt that this lowly status instilled a hesitance to advocate for change due to fear of poor  
11  
12 evaluations or seeming unprofessional if reported to the clerkship director. Students also  
13  
14 emphasized that advocating for improvement seemed futile as they cannot resign from the  
15  
16 job of a medical student if they are truly unhappy during a placement, and would rather  
17  
18 tolerate mistreatment than risk poor judgment from preceptors.  
19  
20  
21  
22  
23  
24

#### 25 *2B. Consequences of cynicism on physician well-being and patient care*

26

27 A common theme across discussion boards was the consequences of progressive  
28  
29 cynicism throughout medical training, which likely had a negative impact on physician  
30  
31 career satisfaction, the quality of patient care, and the quality of mentorship for future  
32  
33 generations. Many also highlighted the intergenerational transmission of norms and how  
34  
35 unhappy doctors tend to produce more unhappy doctors.  
36  
37  
38

39 Medical trainee mental health was raised in a number of discussion threads related  
40  
41 to career satisfaction. Commenters noted the high rate of poor mental health documented  
42  
43 among medical students and residents compared to other professions. However, several  
44  
45 students and residents were hesitant to seek help because they feared that this would be  
46  
47 perceived as a sign of "weakness" in a field where professionalism and perseverance are  
48  
49 highly valued. Overall, commenters felt that contributing factors to poor mental health  
50  
51 should be addressed rather than criticizing individuals who have a reduced quality of life  
52  
53 and difficulties in work life balance.  
54  
55  
56  
57  
58  
59  
60

1  
2  
3  
4 Acknowledging cynicism in medical school also prompted individuals in the  
5  
6 discussion groups to recognize the implications of mentorship. They advocated for the need  
7  
8 for more focus on the consequences of cynicism in medicine. Posts praised the existence of  
9  
10 forums that discussed the nature of cynicism in medicine, acknowledging that open  
11  
12 dialogue and information sharing can support change, such as creating more informed pre-  
13  
14 med students, promoting mental health programs in medical schools and residency, and  
15  
16 working towards improving work environments rather than perpetuating shame in  
17  
18  
19  
20  
21  
22  
23  
24  
25  
26  
27  
28  
29  
30  
31  
32  
33  
34  
35  
36  
37  
38  
39  
40  
41  
42  
43  
44  
45  
46  
47  
48  
49  
50  
51  
52  
53  
54  
55  
56  
57  
58  
59  
60

### 3. The culture of tolerance of unprofessional behaviours throughout training and across generations

Commenters felt that unprofessional work environments in medicine were slow to change due to the stigma among students and residents that feeling overwhelmed is an indication of being inadequate. Unprofessional behavior in this context typically referred to a lack of respect that trainees received from supervisors and trying to meet high demands in medicine that may compromise good patient care. Consequently, trainees are afraid to seek help or admit to being overworked in an environment where individuals are typically very high-achievers and set high expectations for themselves and their colleagues. The perpetuation of stressful work environments may be due to transmission of norms, namely preceptors normalizing the challenges they experienced in their formative years and then maintaining similar conditions for their trainees.

“I've seen so many residents embrace the attitude in this weird form of quasi-Stockholm Syndrome, where they downplay, excuse, or even support the negative aspects of being a resident all while their quality of life suffers. I understand it as a



1  
2  
3  
4 coping mechanism, but it keeps that attitude alive for the next generation of  
5 residents.” (Thread 7)  
6

7  
8 “A culture in medicine that reflexively defends the sucky parts of medicine as  
9 necessary or desirable isn't a culture that's likely to promote change.” (Thread 7)  
10

11 Students and trainees acknowledged that the harsh work environment and lack of respect  
12 from supervisors posed a greater challenge than solely long work hours. However, the  
13 culture to prevail and achieve in medicine was again brought up as the reason for continued  
14 silence.  
15

16  
17  
18  
19  
20 “It is the med-school culture. There is little support. Students just don't admit how  
21 hard it is. There is an unsaid stigma that feeling stressed/overwhelmed/exhausted/or  
22 hurt makes one "weak" in medical school.” (Thread 5)  
23

24  
25 Ultimately, the consequence of defending a culture that pushes for high efficiency and  
26 achievements at the expense of the individual's wellbeing was viewed as a barrier to  
27 progress in medical education.  
28

29  
30  
31  
32 “It is still so difficult for people in medicine to open up about their struggles (with  
33 balancing efficiency vs learning). When these disclosures are met with criticism, it  
34 encourages everyone else who may be unhappy with their situation to continue to  
35 suffer in silence.” (Thread 6)  
36

## 37 38 39 **DISCUSSION**

40  
41 In the present study, we utilized an novel analysis of discussion posts to explore  
42 cynicism by Canadian and American medical students, residents, and faculty members and  
43 uncovered three key themes: 1) the challenges inherent to the hierarchal and demanding  
44 nature of medicine; 2) the need to safeguard well-being; and 3) the culture of tolerance of  
45 unprofessional behaviors.  
46  
47  
48  
49  
50

51  
52 Results from previous studies have not made a definitive conclusion on whether  
53 empathy declines as medical students enter their clinical year of training. While some  
54  
55  
56  
57  
58  
59

1  
2  
3  
4 studies note that the first drastic decline in empathy and loss of idealization occurs in third  
5  
6 year of medical school, others have suggested that changes in empathy levels do not differ  
7  
8 significantly as medical students and residents progress in their training.<sup>16,29,30,31,32,33</sup> Our  
9  
10 analysis of online discussion forums supports the notion that the loss of empathy and  
11  
12 development of cynicism are progressive in nature and evolve largely during the transition  
13  
14 from pre-clerkship to clerkship. This may occur because clerkship students are faced with  
15  
16 similar clinical challenges and ethical dilemmas as the rest of the medical team, but have a  
17  
18 minimal authoritative role. Being in this position makes students more vulnerable to  
19  
20 influences by their mentors, and students may feel conflicted when their personal values of  
21  
22 “good doctoring” do not align with preceptors’ practices of “real doctoring.” Our results  
23  
24 align with other studies demonstrating that the hierarchal nature of medicine and poor role  
25  
26 modeling can create unprofessional work environments and increased stress on trainees.  
27  
28 This unprofessionalism may be more distressing than frequent exposure to traumatic  
29  
30 clinical cases.<sup>8,34,35</sup>

31  
32 Testerman et al. have proposed two models for the development of cynicism: 1) the  
33  
34 intergenerational model, where a student’s cynicism occurs progressively as a coping  
35  
36 mechanism to mistreatment by cynical residents and staff, and 2) the professional identity  
37  
38 model that suggests cynicism among trainees declines as individuals attain a higher  
39  
40 authoritative position and become more confident in dealing with the contradicting values  
41  
42 of the formal and hidden curriculum.<sup>12</sup> Testerman et al. supported the professional identity  
43  
44 model because they noted a decline in cynicism among staff who achieved a “professional  
45  
46 identity,” as compared to residents and students. Results from our study, however, seem to  
47  
48 favor the intergenerational model, as residents describe being more cynical during  
49  
50  
51  
52  
53  
54  
55  
56  
57  
58  
59  
60

1  
2  
3  
4 residency when compared to medical school, and attribute this progression to a “staircase”  
5  
6 that one climbs throughout training. This conceptualization of the development and  
7  
8 progression of cynicism was also noted in a study by Griffith et al, as within the first 5  
9  
10 months of postgraduate training, residents perceived their patients with less idealistic  
11  
12 values.<sup>36</sup>  
13  
14

15  
16 Research has linked elements of the hidden curriculum to the development of  
17  
18 cynicism. In a study of internal medicine residents, Billings ME et al. demonstrated that the  
19  
20 hidden curriculum, and specifically unprofessional behavior from colleagues, nurses, and  
21  
22 patients, correlated with residents’ level of depersonalization, emotional exhaustion, and  
23  
24 level of cynicism.<sup>37</sup> Similar to our findings, residents from this study also attributed  
25  
26 belittlement from staff, lack of control over scheduling, loss of autonomy in the clinical  
27  
28 setting, and poor work relationships as factors that led to burnout. Increasing cynicism  
29  
30 among residents parallels the pattern of increasing cynicism among medical students; both  
31  
32 medical students and residents start medical school and internship with higher empathy and  
33  
34 lower emotional distress, but experience a decline in empathy overtime.<sup>7,29</sup> Our findings  
35  
36 suggest that there may be a “double hit” scenario, where trainees are most vulnerable to  
37  
38 increased cynicism when transitioning to clerkship, and then again when transitioning to  
39  
40 residency. It has been posited that this may be a protective mechanism at times of  
41  
42 transition.<sup>14,15</sup>  
43  
44  
45  
46  
47

48 Emotional neutralization, a consequence of cynicism, carries a negative connotation  
49  
50 during the early medical training process. That said, practicing physicians view emotional  
51  
52 neutralization as a coping mechanism to sustain the various clinical, hierarchal, and system  
53  
54 challenges that one faces in medicine.<sup>38</sup> Our findings support that cynicism occurs when  
55  
56  
57  
58  
59  
60

1  
2  
3  
4 trainees cope to safeguard their personal wellbeing in a highly demanding work  
5  
6 environment. The impact of cynicism among physicians is substantial; consequences  
7  
8 include a decline in professionalism, burnout, and a loss of empathy that can ultimately  
9  
10 jeopardize patient care.<sup>1,37,39</sup> In order to mitigate these consequences, an understanding of  
11  
12 how and why cynicism develops is key. Online forums provide a holistic view into this  
13  
14 topic by presenting diverse perspectives from geographically dispersed individuals, and  
15  
16 across the spectrum of training and practice.  
17  
18

19  
20 As emphasized in previous studies, our findings also support the importance of role  
21  
22 modeling and mentorship in addressing cynicism and the hidden curriculum.<sup>40,41,42,43,44</sup>  
23  
24 Students and residents seek inspiration from mentors and experience more idealism when  
25  
26 they identify positive role models.<sup>7,45</sup> On the other hand, the lack of positive role models,  
27  
28 such as being taught by cynical residents and staff, facilitated the development of cynicism  
29  
30 and a decline in empathy among medical students.<sup>1,37,46</sup> Results from our study support the  
31  
32 notion that mentorship and positive role modeling should be made available throughout  
33  
34 medical training, such that professional attitudes and support can be passed on from staff to  
35  
36 trainees. Mentorship structures should be reinforced during the transition period from pre-  
37  
38 clerkship to clerkship, and from medical school to residency, as these seem to be key  
39  
40 moments when there is a potential increase in cynicism and decline in empathy. While the  
41  
42 concept of mentorship in reducing cynicism is not a novel recommendation, this study  
43  
44 highlights that although issues pertaining to the hidden curriculum have been  
45  
46 acknowledged in the medical literature, they continue to persist in daily medical culture.  
47  
48  
49  
50  
51

52 A major strength of this study design is that online discussion forums allow for a  
53  
54 greater understanding of the hidden curriculum at an international level due to the ease of  
55  
56  
57  
58  
59  
60

1  
2  
3  
4 access to forums by users from Canada and the USA. That said, given the we were unable  
5  
6 to isolate the geographical location of posters, this study does not allow for a detailed  
7  
8 commentary on potential areas of congruence or divergence between nations. Over the last  
9  
10 10 years, there has been increasing evidence from studies done at single academic  
11  
12 institutions that cynicism progresses from non-clinical to clinical years.<sup>2,11,14,15</sup> Our study  
13  
14 expands on this idea and may carry greater external validity given that the viewpoints from  
15  
16 discussion forums reflect those of individuals from several institutions, levels of training,  
17  
18 and specialties. The capacity for user anonymity on forums promotes dynamic interactions  
19  
20 between individuals with lower risk of consequence. These forums create a democratic  
21  
22 space for sharing emotionally powerful experiences that highlight the tension between the  
23  
24 realities of medicine as influenced by the hidden curriculum and personal expectations of  
25  
26 good doctoring. Online discussion forums can also minimize social desirability response  
27  
28 bias, which may be present in other qualitative methods that involve face-to-face  
29  
30 interaction with peers and colleagues, such as focus groups involving staff, residents, and  
31  
32 medical students. In a discussion forum, the hierarchal nature of medicine is minimized  
33  
34 such that the pressure to respond in a manner perceived as acceptable or one that aligns  
35  
36 with the dominant discourse are lessened.

37  
38  
39  
40  
41  
42  
43 Our study has some notable limitations. Contributors to discussion forums may be  
44  
45 biased towards individuals who use forums to discuss their concerns and provide support  
46  
47 for others on the site. Discussion posters in this study may comprise of individuals that feel  
48  
49 more vulnerable and are reaching out anonymously for this reason, and they may in fact be  
50  
51 more cynical than the general medical community. Although commenters on the discussion  
52  
53 boards did not identify their country of origin, we assume that most commenters are  
54  
55  
56  
57  
58  
59  
60

1  
2  
3  
4 residents of either the United States or Canada, reflecting North American medical practice.  
5  
6 Additionally, our purposeful sampling and selection strategy of threads for inclusion in  
7  
8 analysis could have introduced bias. For example, by selecting threads that explicitly  
9  
10 examined cynicism, we may have inadvertently excluded threads containing divergent or  
11  
12 opposing views. Finally, we obtained agreement from discussion board commenters  
13  
14 retrospectively to include their verbatim quotes. This limited our sample of quotes for  
15  
16 inclusion as some commenters may not have been active on the discussion boards at the  
17  
18 time we contacted them and did not reply to our request for permission. In those instances,  
19  
20 the content of postings was summarized and described but the verbatim quotes could not be  
21  
22 included for publication.  
23  
24  
25

26  
27 Ultimately, cynicism among doctors has been shown to affect the quality of patient  
28  
29 care.<sup>47,48</sup> Addressing and acknowledging cynicism as a main theme of the hidden  
30  
31 curriculum can serve as an initial step in establishing true patient centered care.  
32  
33

## 34 **CONCLUSION**

35  
36 Our unique study has demonstrated the potential for online discussion groups to  
37  
38 provide unique insight into the culture of medical training. Our findings highlight that  
39  
40 exposure to the differing values of the formal and hidden curriculum seems to impact  
41  
42 cynicism in trainees at all stages of learning, and particularly at transition points.  
43  
44 Interventions that can help reduce cynicism could focus on decreasing the gap between the  
45  
46 formal and hidden curriculum that is passed on through stages of medical training.  
47  
48 Examples of such interventions include mentorship and positive role modeling, especially  
49  
50 at transition periods from pre-clerkship to clerkship and from medical school to residency.  
51  
52  
53  
54  
55  
56  
57  
58  
59  
60

1  
2  
3  
4 Future studies could explore perceptions and attitudes among trainees at key transition  
5  
6 points to further examine how cynicism evolves between various stages of training.  
7  
8  
9

10  
11 *Contributors:* JP contributed to the acquisition, data analysis, interpretation and drafting of  
12  
13 the project. CC contributed to the design, data analysis and interpretation of the work, and  
14  
15 revised the manuscript for important intellectual content. AD contributed to the design, data  
16  
17 analysis and interpretation of the work, and revised the manuscript for important  
18  
19 intellectual content. All authors approved the final manuscript for publication.  
20  
21

22  
23 *Acknowledgements:* None  
24

25 *Funding:* This research received no specific grant from any funding agency in the public,  
26  
27 commercial, or not-for-profit sectors

28  
29 *Conflicts of Interest:* None  
30

31 *Ethical Approval:* This study was approved by the Children's Hospital of Eastern Ontario  
32  
33 Research Institute Research Ethics Board (ref 16/31X) on May 25, 2016.

34 Data: Raw data is available by replicating our search strategy in the following discussion  
35  
36 groups: <https://www.studentdoctor.net/> and <http://forums.premed101.com/>.

## 37 38 **REFERENCES:**

- 39  
40 1. Brazeau CM, Schroeder R, Rovi S, Boyd L. Relationships between medical student  
41  
42 burnout, empathy, and professionalism climate. *Acad Med* 2010; 85: S33-S36.  
43
- 44 2. Lempp H, Seale C. The hidden curriculum in undergraduate medical education:  
45  
46 qualitative study of medical students' perceptions of teaching. *BMJ* 2004; 329: 770-3.  
47  
48
- 49 3. Hafferty FW. Beyond curriculum reform: Confronting medicine's hidden  
50  
51 curriculum. *Acad Med* 1998; 73: 403-407.  
52  
53  
54  
55  
56  
57  
58  
59  
60

- 1  
2  
3  
4 4. White CB, Kumagai AK, Ross PT, Fantone JC. A qualitative exploration of how the  
5  
6 conflict between the formal and informal curriculum influences student values and  
7  
8 behaviors. *Acad Med* 2009; 84: 597-603.  
9
- 10  
11 5. West CP, Shanafelt TD. The influence of personal and environmental factors on  
12  
13 professionalism in medical education. *BMC Medical Education* 2007; 7:29.  
14
- 15  
16 6. Hojat M, Vergare M, Maxwell K, Brainard G, Herrine S, Isenberg G, Veloski J,  
17  
18 Gonnella J. The devil is the third year: A longitudinal study of erosion of empathy in  
19  
20 medical school. *Acad Med* 2009; 84: 1182-1191.  
21
- 22  
23 7. Neumann M, Edelhauser F, Tauschel D, Fischer MR, Wirtz M, Woopen C et al.  
24  
25 Empathy decline and its reasons: a systematic review of studies with medical students  
26  
27 and residents. *Acad Med* 2011; 86: 996-1009.  
28
- 29  
30 8. Newton BW, Barber L, Clardy J, Cleveland E, O'Sullivan P. Is there hardening of the  
31  
32 heart during medical school? *Acad Med* 2008; 83: 244-249.  
33
- 34  
35 9. Singh S. Empathy: Lost or Found in Medical Education? *MedGenMed* 2005; 7: 74.  
36
- 37  
38 10. Chen DR, Pahilan ME, Orlander JD. Comparing a self-administered measure of  
39  
40 empathy with observed behavior among medical students. *Journal of General*  
41  
42 *Internal Medicine* 2010; 25: 200-202.  
43
- 44  
45 11. Gaufberg E, Batalden M, Sands R, Bell S. The hidden curriculum: What can we learn  
46  
47 from third-year medical student narrative reflections? *Acad Med* 2010; 85: 1709 –  
48  
49 1716.  
50
- 51  
52 12. Testerman JK, Morton KR, Loo LK, Worthley JS, Lamberton HH. The natural  
53  
54 history of cynicism in physicians. *Acad Med* 1996; 71: S43-S45.  
55  
56  
57  
58  
59  
60



- 1  
2  
3  
4 13. Hojat M, Mangione S, Nasca TJ, Rattner S, Erdmann JB, Gonnella JS et al. An  
5  
6 empirical study of decline in empathy in medical school. *Med Educ* 2004; 38: 934-41.  
7  
8  
9 14. Bellini LM, Baime M, Shea JA. Variation of mood and empathy during internship.  
10  
11 *JAMA* 2002; 287: 3143-3146.  
12  
13 15. Bellini LM, Shea JA. Mood change and empathy decline persist during three years of  
14  
15 Internal Medicine Training. *Acad Med* 2005; 80: 164-167.  
16  
17 16. Stratta EC, Riding DM, Baker P. Ethical erosion in newly qualified doctors:  
18  
19 perceptions of empathy decline. *Int J Med Educ* 2016; 7: 286 – 92.  
20  
21 17. Sherbino J, Joshi N, Lin M. JGME-ALiEM Hot topics in medical education online  
22  
23 journal club: An analysis of a virtual discussion about resident teachers. *J Grad Med*  
24  
25 *Educ* 2015; 7: 437-44.  
26  
27 18. Makoul G, Zick AB, Aakhus M, Neely KJ, Roemer PE. Using an online forum to  
28  
29 encourage reflection about difficult conversations in medicine. *Patient Educ Couns*  
30  
31 2010; 79: 83-6.  
32  
33 19. Barnett S, Jones SC, Caton T, Iverson D, Bennett S, Robinson L. Implementing a  
34  
35 virtual community of practice for family physician training: a mixed-methods case  
36  
37 study. *J Med Internet Res* 2014; 16: e83.  
38  
39 20. The Number of Unmatched Students Doubled in Carms 2017 [Internet].  
40  
41 Premed101. April 2017 [cited 24 April 2018]. Available from:  
42  
43 [http://forums.premed101.com/topic/95038-the-number-of-unmatched-students-](http://forums.premed101.com/topic/95038-the-number-of-unmatched-students-doubled-in-carms-2017/)  
44  
45 [doubled-in-carms-2017/](http://forums.premed101.com/topic/95038-the-number-of-unmatched-students-doubled-in-carms-2017/)  
46  
47  
48  
49  
50  
51  
52  
53  
54  
55  
56  
57  
58  
59  
60

- 1  
2  
3  
4 21. Annual Specialty Competitiveness Stats. [Internet]. Premed101. July 2014 [cited: 24  
5 April 2018]. Available from: [http://forums.premed101.com/topic/78629-annual-  
6 specialty-competitiveness-stats/  
7  
8  
9](http://forums.premed101.com/topic/78629-annual-specialty-competitiveness-stats/)
- 10  
11 22. Fusch PI, Ness LR. Are we there yet? Data saturation in qualitative research. *The  
12 Qualitative Report* 2015; 20: 1408.
- 13  
14  
15 23. Bradley EH, Curry LA, Devers KJ. Qualitative data analysis for health services  
16 research: developing taxonomy, themes, and theory. *Health services research* 2007;  
17 42:1758-1772.
- 18  
19  
20 24. Varpio L, Ajjawi R, Monrouxe LV, O'brien BC, Rees CE. Shedding the cobra  
21 effect: problematising thematic emergence, triangulation, saturation and member  
22 checking. *Med Educ* 2017; 51: 40-50.
- 23  
24  
25 25. Strauss A, Corbin J. Basics of qualitative research: Grounded theory procedures and  
26 techniques. Newbury Park: SAGE Publications 1990.
- 27  
28  
29 26. Elo S, Kyngas H. The qualitative content analysis process. *J Adv Nurs* 2008; 62: 107-  
30 115.
- 31  
32  
33 27. Bohm A. Theoretical coding: Text analysis in Grounded Theory. (In U Flick, E  
34 Kardorff, I Steinke (Eds.), *A companion to qualitative research* (p 270 – 275).  
35 London: SAGE Publications 2004.
- 36  
37  
38 28. Gooden RJ, Windfield HR. Breast and prostate cancer online discussion boards: a  
39 thematic analysis of gender differences and similarities. *Journal of Health  
40 Psychology* 2007; 12: 103-114.
- 41  
42  
43 29. Ludwig AB, Burton W, Weingarten J, Milan F, Myers DC, Kligler B. Depression and  
44 stress amongst undergraduate medical students. *BMC Med Educ* 2015; 15: 141.
- 45  
46  
47  
48  
49  
50  
51  
52  
53  
54  
55  
56  
57  
58  
59  
60

- 1  
2  
3  
4 30. Roff S. Reconsidering the “decline” of medical student empathy as reported in  
5 studies using the Jefferson Scale of Physician Empathy-Student version (JSPE-S).  
6  
7 *Med Teach* 2015; 37: 1-4.  
8  
9  
10  
11 31. Bratek A, Buiska W, Bonk M, Seweryn M, Krysta K. Empathy among physicians,  
12 medical students, and candidates. *Psychiatr Danub* 2015; 27: S48-52.  
13  
14  
15 32. Shashikumar R, Chaudhary R, Ryali VS, Bhat PS, Srivastava K, Prakash J, Basannar  
16 D. Cross sectional assessment of empathy among undergraduates from a medical  
17 college. *Med J Armed Forces India* 2014; 70: 179- 85.  
18  
19  
20  
21 33. Hegazi I, Wilson I. Maintaining empathy in medical school: it is possible. *Med teach*  
22 2013; 35: 1002-8.  
23  
24  
25  
26  
27 34. Haglund M, aan het Rot M, Cooper NS, et al. Resilience in the third year of medical  
28 school: A prospective study of the associations between stressful events occurring  
29 during clinical rotations and student well-being. *Acad Med* 2009; 84: 258-268.  
30  
31  
32  
33 35. Dornan T, Pearson E, Carson P, Helmich E, Bundy C. Emotions and identity in the  
34 figured world of becoming a doctor. *Med Educ* 2015; 49: 174-85.  
35  
36  
37  
38 36. Griffith CH, Wilson JF. The loss of idealism throughout internship. *Eval Health Prof*  
39 2003; 26: 415-426.  
40  
41  
42  
43 37. Billings ME, Lazarus ME, Wenrich M, Curtis JR, Engelberg RA. The effect of the  
44 hidden curriculum on resident burnout and cynicism. *J Grad Med Educ* 2011; 3: 503-  
45 10.  
46  
47  
48  
49  
50  
51  
52  
53  
54  
55  
56  
57  
58  
59  
60

- 1  
2  
3  
4 38. Doja A, Bould DM, Clarkin C, Eady K, Sutherland S, Writer H. The hidden and  
5  
6 informal curriculum across the continuum of training: A cross-sectional qualitative  
7  
8 study. *Med Teach* 2016; 38: 410-8.  
9  
10  
11 39. Prins JT, Gazendam Donofrio SM, Tubben BJ, van der Heijden FM, van de Wiel  
12  
13 HB, Hoekstra-Weebers JE. Burnout in medical residents: a review. *Med Educ* 2007;  
14  
15 41: 788-800.  
16  
17  
18 40. McKenna AM, Straus SE. Charting a professional course: A review of mentorship  
19  
20 in medicine. *J Am Coll Radiol* 2011; 8: 109-112.  
21  
22  
23 41. Straus SE, Johnson MO, Marquez C, Feldman MD. Characteristics of successful  
24  
25 and failed mentoring relationships: A qualitative study across two academic health  
26  
27 centers. *Acad Med* 2013; 88: 82-89.  
28  
29  
30 42. Stamm M, Buddeberg-Fischer B. The impact of mentoring during postgraduate  
31  
32 training on doctors' career success. *Med Educ* 2011; 45: 488-96.  
33  
34  
35 43. Rose GL, Rukstalis MR, Schuckit MA. Informal mentoring between faculty and  
36  
37 medical students. *Acad Med* 2005; 80: 344-8.  
38  
39  
40 44. Howe A. Professional development in undergraduate medical curricula – the key to  
41  
42 the door of a new culture? *Med Educ* 2002; 36: 353-9.  
43  
44  
45 45. Kay J. Traumatic deidealization and the future of medicine. *JAMA* 1990; 263: 572-  
46  
47 573.  
48  
49  
50 46. Greganti MA. Where are the clinical role models? *Arch Intern Med* 1990; 150: 259-  
51  
52 261.  
53  
54  
55  
56  
57  
58  
59  
60

- 1  
2  
3  
4 47. Dewa CS, Loong D, Bonato S, Trojanowski L. The relationship between physician  
5  
6 burnout and quality of healthcare in terms of safety and acceptability: a systematic  
7  
8 review. *BMJ Open* 2017; 7: e015141.  
9  
10  
11 48. Bodenheimer T, Sinsky C. From triple to quadruple aim: Care of the patient requires  
12  
13 care of the provider. *Ann Fam Med* 2014; 12: 573-576.  
14  
15  
16  
17  
18  
19  
20  
21  
22  
23  
24

25 **Table 1: Summary of discussion threads analyzed, discussion forums and**  
26  
27 **country of origin for each thread and the number of posts examined.**  
28

| Thread Name                                                                   | Discussion forum and Country of Origin | Number of posts | Number of posters |
|-------------------------------------------------------------------------------|----------------------------------------|-----------------|-------------------|
| 1. Excessive and unnecessary stress on med students                           | Student Doctor Network – United States | 269             |                   |
| 2. How does med school change a person                                        | Student Doctor Network – United States | 22              |                   |
| 3. My theory on why med students show decline in empathy                      | Student Doctor Network – United States | 46              |                   |
| 4. Why the cynicism                                                           | Student Doctor Network – United States | 54              |                   |
| 5. Mental health in medical school                                            | Student Doctor Network – United States | 29              |                   |
| 6. What they don't tell you before getting into medicine                      | Premed101 – Canada                     | 42              |                   |
| 7. Is it possible to finish med school without becoming too salty or cynical? | Premed101 – Canada                     | 49              |                   |

29  
30  
31  
32  
33  
34  
35  
36  
37  
38  
39  
40  
41  
42  
43  
44  
45  
46  
47  
48  
49  
50  
51 **Table 2 Themes and subthemes from discussion group analysis**  
52

| Themes of the Hidden Curriculum                  | Pertinent subthemes                          |
|--------------------------------------------------|----------------------------------------------|
| <b>Challenges inherent to the hierarchal and</b> | <i>The progression of cynicism over time</i> |

|                                                                                                    |                                                                                                                                                                 |
|----------------------------------------------------------------------------------------------------|-----------------------------------------------------------------------------------------------------------------------------------------------------------------|
| <b>demanding nature of medicine</b>                                                                | <i>The reinforcement of hierarchy that creates an unpleasant work environment</i><br><br><i>The pressure to work long hours and high demands for efficiency</i> |
| <b>Challenges of safeguarding well-being</b>                                                       | <i>Lack of support as a major stressor</i><br><br><i>Consequences of cynicism on physician well-being and patient care</i>                                      |
| <b>Culture of tolerance of unprofessional behaviors throughout training and across generations</b> |                                                                                                                                                                 |

## COREQ (CONsolidated criteria for REporting Qualitative research) Checklist

A checklist of items that should be included in reports of qualitative research. You must report the page number in your manuscript where you consider each of the items listed in this checklist. If you have not included this information, either revise your manuscript accordingly before submitting or note N/A.

| Topic                                          | Item No. | Guide Questions/Description                                                                                                                              | Reported on Page No. |
|------------------------------------------------|----------|----------------------------------------------------------------------------------------------------------------------------------------------------------|----------------------|
| <b>Domain 1: Research team and reflexivity</b> |          |                                                                                                                                                          |                      |
| <i>Personal characteristics</i>                |          |                                                                                                                                                          |                      |
| Interviewer/facilitator                        | 1        | Which author/s conducted the interview or focus group?                                                                                                   |                      |
| Credentials                                    | 2        | What were the researcher's credentials? E.g. PhD, MD                                                                                                     |                      |
| Occupation                                     | 3        | What was their occupation at the time of the study?                                                                                                      |                      |
| Gender                                         | 4        | Was the researcher male or female?                                                                                                                       |                      |
| Experience and training                        | 5        | What experience or training did the researcher have?                                                                                                     |                      |
| <i>Relationship with participants</i>          |          |                                                                                                                                                          |                      |
| Relationship established                       | 6        | Was a relationship established prior to study commencement?                                                                                              |                      |
| Participant knowledge of the interviewer       | 7        | What did the participants know about the researcher? e.g. personal goals, reasons for doing the research                                                 |                      |
| Interviewer characteristics                    | 8        | What characteristics were reported about the interviewer/facilitator? e.g. Bias, assumptions, reasons and interests in the research topic                |                      |
| <b>Domain 2: Study design</b>                  |          |                                                                                                                                                          |                      |
| <i>Theoretical framework</i>                   |          |                                                                                                                                                          |                      |
| Methodological orientation and Theory          | 9        | What methodological orientation was stated to underpin the study? e.g. grounded theory, discourse analysis, ethnography, phenomenology, content analysis |                      |
| <i>Participant selection</i>                   |          |                                                                                                                                                          |                      |
| Sampling                                       | 10       | How were participants selected? e.g. purposive, convenience, consecutive, snowball                                                                       |                      |
| Method of approach                             | 11       | How were participants approached? e.g. face-to-face, telephone, mail, email                                                                              |                      |
| Sample size                                    | 12       | How many participants were in the study?                                                                                                                 |                      |
| Non-participation                              | 13       | How many people refused to participate or dropped out? Reasons?                                                                                          |                      |
| <i>Setting</i>                                 |          |                                                                                                                                                          |                      |
| Setting of data collection                     | 14       | Where was the data collected? e.g. home, clinic, workplace                                                                                               |                      |
| Presence of non-participants                   | 15       | Was anyone else present besides the participants and researchers?                                                                                        |                      |
| Description of sample                          | 16       | What are the important characteristics of the sample? e.g. demographic data, date                                                                        |                      |
| <i>Data collection</i>                         |          |                                                                                                                                                          |                      |
| Interview guide                                | 17       | Were questions, prompts, guides provided by the authors? Was it pilot tested?                                                                            |                      |
| Repeat interviews                              | 18       | Were repeat interviews carried out? If yes, how many?                                                                                                    |                      |
| Audio/visual recording                         | 19       | Did the research use audio or visual recording to collect the data?                                                                                      |                      |
| Field notes                                    | 20       | Were field notes made during and/or after the interview or focus group?                                                                                  |                      |
| Duration                                       | 21       | What was the duration of the interviews or focus group?                                                                                                  |                      |
| Data saturation                                | 22       | Was data saturation discussed?                                                                                                                           |                      |
| Transcripts returned                           | 23       | Were transcripts returned to participants for comment and/or                                                                                             |                      |

| Topic                                  | Item No. | Guide Questions/Description                                                                                                        | Reported on Page No. |
|----------------------------------------|----------|------------------------------------------------------------------------------------------------------------------------------------|----------------------|
|                                        |          | correction?                                                                                                                        |                      |
| <b>Domain 3: analysis and findings</b> |          |                                                                                                                                    |                      |
| <i>Data analysis</i>                   |          |                                                                                                                                    |                      |
| Number of data coders                  | 24       | How many data coders coded the data?                                                                                               |                      |
| Description of the coding tree         | 25       | Did authors provide a description of the coding tree?                                                                              |                      |
| Derivation of themes                   | 26       | Were themes identified in advance or derived from the data?                                                                        |                      |
| Software                               | 27       | What software, if applicable, was used to manage the data?                                                                         |                      |
| Participant checking                   | 28       | Did participants provide feedback on the findings?                                                                                 |                      |
| <i>Reporting</i>                       |          |                                                                                                                                    |                      |
| Quotations presented                   | 29       | Were participant quotations presented to illustrate the themes/findings?<br>Was each quotation identified? e.g. participant number |                      |
| Data and findings consistent           | 30       | Was there consistency between the data presented and the findings?                                                                 |                      |
| Clarity of major themes                | 31       | Were major themes clearly presented in the findings?                                                                               |                      |
| Clarity of minor themes                | 32       | Is there a description of diverse cases or discussion of minor themes?                                                             |                      |

Developed from: Tong A, Sainsbury P, Craig J. Consolidated criteria for reporting qualitative research (COREQ): a 32-item checklist for interviews and focus groups. *International Journal for Quality in Health Care*. 2007. Volume 19, Number 6: pp. 349 – 357

**Once you have completed this checklist, please save a copy and upload it as part of your submission. DO NOT include this checklist as part of the main manuscript document. It must be uploaded as a separate file.**
